# Supplementary material for: The slowing pace of life expectancy gains since 1950
Source: PubMed Central journal article supplement (PMC5773026; doi:10.1186/s12889-018-5058-9), 2018-01-17
Supplement: 12889_2018_5058_MOESM1_ESM.pdf [file 12889_2018_5058_MOESM1_ESM.pdf]

## **Appendix**

### **Content**

|                                                |           |
|------------------------------------------------|-----------|
| <b>1. Data Sources .....</b>                   | <b>1</b>  |
| Life Expectancy at Birth.....                  | 7         |
| Real GDP per capita PPP 2005.....              | 7         |
| Children per woman (total fertility) .....     | 7         |
| Population density (per square kilometer)..... | 8         |
| Estimated HIV Prevalence % - (Ages 15-49)..... | 9         |
| <b>2. Tables .....</b>                         | <b>10</b> |
| <b>3. Figures.....</b>                         | <b>30</b> |
| <b>4. HIV imputation.....</b>                  | <b>33</b> |

### **Tables**

|                                                                                                                                                                                    |    |
|------------------------------------------------------------------------------------------------------------------------------------------------------------------------------------|----|
| Table A-1-1: LEB sources, by country and year.....                                                                                                                                 | 1  |
| Table A-2-1: List of countries included in the analysis, when HIV is not included as a control variable .....                                                                      | 10 |
| Table A-2-2: List of countries included in the analysis, when HIV is included as a control variable.....                                                                           | 12 |
| Table A-2-3: List of countries by strata using a representative year for each decade, during the analysis countries were re-stratified to each LEB stratum every single year ..... | 14 |
| Table A-2-4: Summary statistics, Lowest Stratum (LEB < 51).....                                                                                                                    | 19 |
| Table A-2-5: Summary statistics, Stratum II (51 ≤ LEB < 61) .....                                                                                                                  | 20 |
| Table A-2-6: Summary statistics, Stratum III (61 ≤ LEB < 71).....                                                                                                                  | 21 |
| Table A-2-7: Summary statistics, Highest Stratum (LEB ≥ 71).....                                                                                                                   | 22 |
| Table A-2-8: F-tests of equality between decadal dummies parameters, 1960-69 against 2000-09 and 1980-89 against 2000-09 .....                                                     | 23 |
| Table A-2-9: The effects of LEB, income per capita, fertility, population density, CO2 emissions, and time on LEB decadal gains, 1950 – 2009, Fixed effects model .....            | 24 |
| Table A-2-10: LEB decade gains, by region, decade and LEB strata.....                                                                                                              | 25 |
| Table A-4-1: Countries with HIV imputed values, FE regression (imputation A) and constant prevalence (imputation B) ....                                                           | 33 |

### **Figures**

|                                                                                                     |    |
|-----------------------------------------------------------------------------------------------------|----|
| Figure A-3-1: LEB decadal gains by decade, Stratum II (51≤LEB<61) and Stratum III (61≤LEB<71) ..... | 30 |
| Figure A-3-2: LEB decadal gains distribution by strata, comparison between decades .....            | 31 |

## 1. Data Sources

*Table A-1-1: LEB sources, by country and year*

| Country                | IHME<br>(2014) | WPP<br>(2012) | HMD<br>(2009) | WPP<br>(2008) | Riley file | HMD<br>(2013) | HMD<br>(2011) | Interpolated | Estimate<br>based on<br>age-<br>specific<br>mortality | Gapminder<br>guesstimate | Vallin et<br>al.<br>(2002) |
|------------------------|----------------|---------------|---------------|---------------|------------|---------------|---------------|--------------|-------------------------------------------------------|--------------------------|----------------------------|
| Afghanistan            | 1970-2009      | 1950-1969     |               |               |            |               |               |              |                                                       |                          |                            |
| Albania                | 1970-2009      | 1950-1969     |               |               |            |               |               |              |                                                       |                          |                            |
| Algeria                | 1970-2009      | 1950-1969     |               |               |            |               |               |              |                                                       |                          |                            |
| Angola                 | 1970-2009      | 1950-1969     |               |               |            |               |               |              |                                                       |                          |                            |
| Antigua and Barbuda    | 1970-2009      | 1950-1969     |               |               |            |               |               |              |                                                       |                          |                            |
| Argentina              | 1970-2009      | 1950-1969     |               |               |            |               |               |              |                                                       |                          |                            |
| Armenia                | 1970-2009      | 1950-1969     |               |               |            |               |               |              |                                                       |                          |                            |
| Australia              | 1970-2009      |               | 1950-1969     |               |            |               |               |              |                                                       |                          |                            |
| Austria                | 1970-2009      |               | 1950-1969     |               |            |               |               |              |                                                       |                          |                            |
| Azerbaijan             | 1970-2009      | 1950-1969     |               |               |            |               |               |              |                                                       |                          |                            |
| Bahamas                | 1970-2009      | 1950-1969     |               |               |            |               |               |              |                                                       |                          |                            |
| Bahrain                | 1970-2009      | 1950-1969     |               |               |            |               |               |              |                                                       |                          |                            |
| Bangladesh             | 1970-2009      | 1950-1969     |               |               |            |               |               |              |                                                       |                          |                            |
| Barbados               | 1970-2009      | 1950-1969     |               |               |            |               |               |              |                                                       |                          |                            |
| Belarus                | 1970-2009      |               | 1959-1969     | 1950-1958     |            |               |               |              |                                                       |                          |                            |
| Belgium                | 1970-2009      |               | 1950-1969     |               |            |               |               |              |                                                       |                          |                            |
| Belize                 | 1970-2009      | 1950-1969     |               |               |            |               |               |              |                                                       |                          |                            |
| Benin                  | 1970-2009      | 1950-1969     |               |               |            |               |               |              |                                                       |                          |                            |
| Bhutan                 | 1970-2009      | 1950-1969     |               |               |            |               |               |              |                                                       |                          |                            |
| Bolivia                | 1970-2009      | 1950-1969     |               |               |            |               |               |              |                                                       |                          |                            |
| Bosnia and Herzegovina | 1970-2009      | 1950-1969     |               |               |            |               |               |              |                                                       |                          |                            |
| Botswana               | 1970-2009      | 1950-1969     |               |               |            |               |               |              |                                                       |                          |                            |
| Brazil                 | 1970-2009      | 1950-1969     |               |               |            |               |               |              |                                                       |                          |                            |
| Brunei                 | 1970-2009      | 1950-1969     |               |               |            |               |               |              |                                                       |                          |                            |
| Bulgaria               | 1970-2009      |               | 1950-1969     |               |            |               |               |              |                                                       |                          |                            |
| Burkina Faso           | 1970-2009      | 1950-1969     |               |               |            |               |               |              |                                                       |                          |                            |
| Burundi                | 1970-2009      | 1950-1969     |               |               |            |               |               |              |                                                       |                          |                            |
| Cambodia               | 1970-2009      | 1950-1969     |               |               |            |               |               |              |                                                       |                          |                            |

| Country           | IHME<br>(2014) | WPP<br>(2012)                       | HMD<br>(2009) | WPP<br>(2008) | Riley file    | HMD<br>(2013) | HMD<br>(2011) | Interpolated  | Estimate<br>based on<br>age-<br>specific<br>mortality | Gapminder<br>guesstimate | Vallin et<br>al.<br>(2002) |
|-------------------|----------------|-------------------------------------|---------------|---------------|---------------|---------------|---------------|---------------|-------------------------------------------------------|--------------------------|----------------------------|
| Cameroon          | 1970-2009      | 1950-1969                           |               |               |               |               |               |               |                                                       |                          |                            |
| Canada            | 1970-2009      |                                     | 1950-1969     |               |               |               |               |               |                                                       |                          |                            |
| Cape Verde        | 1970-2009      | 1950-1969                           |               |               |               |               |               |               |                                                       |                          |                            |
| Chad              | 1970-2009      | 1950-1969                           |               |               |               |               |               |               |                                                       |                          |                            |
| Chile             | 1970-2009      |                                     |               | 1950-1969     |               |               |               |               |                                                       |                          |                            |
| China             | 1970-2009      |                                     |               |               | 1953-1969 (1) |               |               | 1950-1952 (1) |                                                       |                          |                            |
| Colombia          | 1970-2009      | 1950-1969                           |               |               |               |               |               |               |                                                       |                          |                            |
| Comoros           | 1970-2009      | 1950-1969                           |               |               |               |               |               |               |                                                       |                          |                            |
| Congo, Dem. Rep.  | 1970-2009      | 1950-1969                           |               |               |               |               |               |               |                                                       |                          |                            |
| Congo, Rep.       | 1970-2009      | 1950-1969                           |               |               |               |               |               |               |                                                       |                          |                            |
| Costa Rica        | 1970-2009      | 1950-1969                           |               |               |               |               |               |               |                                                       |                          |                            |
| Cote d'Ivoire     | 1970-2009      | 1950-1969                           |               |               |               |               |               |               |                                                       |                          |                            |
| Croatia           | 1970-2009      | 1950-1969                           |               |               |               |               |               |               |                                                       |                          |                            |
| Cuba              | 1970-2009      | 1950-1969                           |               |               |               |               |               |               |                                                       |                          |                            |
| Cyprus            | 1970-2009      | 1950-1969                           |               |               |               |               |               |               |                                                       |                          |                            |
| Denmark           | 1970-2009      |                                     | 1950-1969     |               |               |               |               |               |                                                       |                          |                            |
| Djibouti          | 1970-2009      | 1950-1969                           |               |               |               |               |               |               |                                                       |                          |                            |
| Ecuador           | 1970-2009      | 1950-1969                           |               |               |               |               |               |               |                                                       |                          |                            |
| Egypt             | 1970-2009      | 1950-1969                           |               |               |               |               |               |               |                                                       |                          |                            |
| El Salvador       | 1970-2009      | 1950-1969                           |               |               |               |               |               |               |                                                       |                          |                            |
| Equatorial Guinea | 1970-2009      | 1950-1969                           |               |               |               |               |               |               |                                                       |                          |                            |
| Eritrea           | 1970-2009      | 1950-1969                           |               |               |               |               |               |               |                                                       |                          |                            |
| Estonia           | 1970-2009      |                                     | 1959-1969     |               |               |               |               |               |                                                       | 1950-1958 (2)            |                            |
| Ethiopia          | 1970-2009      | 1950-1956<br>1959-1963<br>1967-1969 |               |               |               |               |               |               | 1957-1958<br>1964-1966 (3)                            |                          |                            |
| Fiji              | 1970-2009      | 1950-1969                           |               |               |               |               |               |               |                                                       |                          |                            |
| Finland           | 1970-2009      |                                     | 1950-1969     |               |               |               |               |               |                                                       |                          |                            |
| France            | 1970-2009      |                                     | 1950-1969     |               |               |               |               |               |                                                       |                          |                            |
| Gabon             | 1970-2009      | 1950-1969                           |               |               |               |               |               |               |                                                       |                          |                            |
| Gambia            | 1970-2009      | 1950-1969                           |               |               |               |               |               |               |                                                       |                          |                            |
| Georgia           | 1970-2009      | 1950-1969                           |               |               |               |               |               |               |                                                       |                          |                            |

| Country          | IHME<br>(2014) | WPP<br>(2012)          | HMD<br>(2009) | WPP<br>(2008) | Riley file | HMD<br>(2013) | HMD<br>(2011) | Interpolated  | Estimate<br>based on<br>age-<br>specific<br>mortality | Gapminder<br>guesstimate | Vallin et<br>al.<br>(2002) |
|------------------|----------------|------------------------|---------------|---------------|------------|---------------|---------------|---------------|-------------------------------------------------------|--------------------------|----------------------------|
| Germany          | 1970-2009      | 1950-1955              |               |               |            | 1956-1969     |               |               |                                                       |                          |                            |
| Ghana            | 1970-2009      | 1950-1969              |               |               |            |               |               |               |                                                       |                          |                            |
| Greece           | 1970-2009      | 1950-1969              |               |               |            |               |               |               |                                                       |                          |                            |
| Grenada          | 1970-2009      | 1950-1969              |               |               |            |               |               |               |                                                       |                          |                            |
| Guatemala        | 1970-2009      | 1950-1969              |               |               |            |               |               |               |                                                       |                          |                            |
| Guinea           | 1970-2009      | 1950-1969              |               |               |            |               |               |               |                                                       |                          |                            |
| Guinea-Bissau    | 1970-2009      | 1960-1969              |               |               |            |               |               | 1950-1959 (4) |                                                       |                          |                            |
| Guyana           | 1970-2009      | 1950-1969              |               |               |            |               |               |               |                                                       |                          |                            |
| Haiti            | 1970-2009      | 1950-1969              |               |               |            |               |               |               |                                                       |                          |                            |
| Honduras         | 1970-2009      | 1950-1969              |               |               |            |               |               |               |                                                       |                          |                            |
| Hong Kong, China | 1970-2009      | 1950-1969              |               |               |            |               |               |               |                                                       |                          |                            |
| Hungary          | 1970-2009      |                        | 1950-1969     |               |            |               |               |               |                                                       |                          |                            |
| Iceland          | 1970-2009      |                        | 1950-1969     |               |            |               |               |               |                                                       |                          |                            |
| India            | 1970-2009      | 1950-1969              |               |               |            |               |               |               |                                                       |                          |                            |
| Indonesia        | 1970-2009      | 1950-1964<br>1967-1969 |               |               |            |               |               |               | 1965-1966 (5)                                         |                          |                            |
| Iran             | 1970-2009      | 1950-1969              |               |               |            |               |               |               |                                                       |                          |                            |
| Iraq             | 1970-2009      | 1950-1969              |               |               |            |               |               |               |                                                       |                          |                            |
| Ireland          | 1970-2009      |                        | 1950-1969     |               |            |               |               |               |                                                       |                          |                            |
| Israel           | 1970-2009      |                        |               | 1950-1969     |            |               |               |               |                                                       |                          |                            |
| Italy            | 1970-2009      |                        | 1950-1969     |               |            |               |               |               |                                                       |                          |                            |
| Jamaica          | 1970-2009      | 1950-1969              |               |               |            |               |               |               |                                                       |                          |                            |
| Japan            | 1970-2009      |                        | 1950-1969     |               |            |               |               |               |                                                       |                          |                            |
| Jordan           | 1970-2009      | 1950-1969              |               |               |            |               |               |               |                                                       |                          |                            |
| Kazakhstan       | 1970-2009      | 1950-1969              |               |               |            |               |               |               |                                                       |                          |                            |
| Kenya            | 1970-2009      | 1950-1969              |               |               |            |               |               |               |                                                       |                          |                            |
| Kiribati         | 1970-2009      | 1950-1969              |               |               |            |               |               |               |                                                       |                          |                            |
| Kuwait           | 1970-2009      | 1950-1969              |               |               |            |               |               |               |                                                       |                          |                            |
| Latvia           | 1970-2009      | 1950-1958              |               |               |            | 1959-1969     |               |               |                                                       |                          |                            |
| Lebanon          | 1970-2009      | 1950-1969              |               |               |            |               |               |               |                                                       |                          |                            |
| Lesotho          | 1970-2009      | 1950-1969              |               |               |            |               |               |               |                                                       |                          |                            |
| Liberia          | 1970-2009      | 1950-1969              |               |               |            |               |               |               |                                                       |                          |                            |

| Country               | IHME<br>(2014) | WPP<br>(2012) | HMD<br>(2009) | WPP<br>(2008) | Riley file | HMD<br>(2013) | HMD<br>(2011) | Interpolated | Estimate<br>based on<br>age-<br>specific<br>mortality | Gapminder<br>guesstimate | Vallin et<br>al.<br>(2002) |
|-----------------------|----------------|---------------|---------------|---------------|------------|---------------|---------------|--------------|-------------------------------------------------------|--------------------------|----------------------------|
| Libya                 | 1970-2009      | 1950-1969     |               |               |            |               |               |              |                                                       |                          |                            |
| Lithuania             | 1970-2009      |               | 1959-1969     | 1950-1958     |            |               |               |              |                                                       |                          |                            |
| Luxembourg            | 1970-2009      |               | 1960-1969     | 1950-1959     |            |               |               |              |                                                       |                          |                            |
| Macao, China          | 1970-2009      | 1950-1969     |               |               |            |               |               |              |                                                       |                          |                            |
| Macedonia, FYR        | 1970-2009      | 1950-1969     |               |               |            |               |               |              |                                                       |                          |                            |
| Madagascar            | 1970-2009      | 1950-1969     |               |               |            |               |               |              |                                                       |                          |                            |
| Malawi                | 1970-2009      | 1950-1969     |               |               |            |               |               |              |                                                       |                          |                            |
| Malaysia              | 1970-2009      | 1950-1969     |               |               |            |               |               |              |                                                       |                          |                            |
| Maldives              | 1970-2009      | 1950-1969     |               |               |            |               |               |              |                                                       |                          |                            |
| Mali                  | 1970-2009      | 1950-1969     |               |               |            |               |               |              |                                                       |                          |                            |
| Malta                 | 1970-2009      | 1950-1969     |               |               |            |               |               |              |                                                       |                          |                            |
| Mauritania            | 1970-2009      | 1950-1969     |               |               |            |               |               |              |                                                       |                          |                            |
| Mauritius             | 1970-2009      | 1950-1969     |               |               |            |               |               |              |                                                       |                          |                            |
| Mexico                | 1970-2009      | 1950-1969     |               |               |            |               |               |              |                                                       |                          |                            |
| Micronesia, Fed. Sts. | 1970-2009      | 1950-1969     |               |               |            |               |               |              |                                                       |                          |                            |
| Moldova               | 1970-2009      | 1950-1969     |               |               |            |               |               |              |                                                       |                          |                            |
| Mongolia              | 1970-2009      | 1950-1969     |               |               |            |               |               |              |                                                       |                          |                            |
| Montenegro            | 1970-2009      | 1950-1969     |               |               |            |               |               |              |                                                       |                          |                            |
| Morocco               | 1970-2009      | 1950-1969     |               |               |            |               |               |              |                                                       |                          |                            |
| Mozambique            | 1970-2009      | 1950-1969     |               |               |            |               |               |              |                                                       |                          |                            |
| Namibia               | 1970-2009      | 1950-1969     |               |               |            |               |               |              |                                                       |                          |                            |
| Nepal                 | 1970-2009      | 1950-1969     |               |               |            |               |               |              |                                                       |                          |                            |
| Netherlands           | 1970-2009      |               | 1950-1969     |               |            |               |               |              |                                                       |                          |                            |
| New Zealand           | 1970-2009      |               | 1950-1969     |               |            |               |               |              |                                                       |                          |                            |
| Nicaragua             | 1970-2009      | 1950-1969     |               |               |            |               |               |              |                                                       |                          |                            |
| Niger                 | 1970-2009      | 1950-1969     |               |               |            |               |               |              |                                                       |                          |                            |
| Nigeria               | 1970-2009      | 1950-1966     |               |               |            |               |               |              | 1967-1969 (6)                                         |                          |                            |
| Norway                | 1970-2009      |               | 1950-1969     |               |            |               |               |              |                                                       |                          |                            |
| Oman                  | 1970-2009      | 1950-1969     |               |               |            |               |               |              |                                                       |                          |                            |
| Pakistan              | 1970-2009      | 1950-1969     |               |               |            |               |               |              |                                                       |                          |                            |
| Panama                | 1970-2009      | 1950-1969     |               |               |            |               |               |              |                                                       |                          |                            |
| Papua New Guinea      | 1970-2009      | 1950-1969     |               |               |            |               |               |              |                                                       |                          |                            |

| Country               | IHME<br>(2014) | WPP<br>(2012) | HMD<br>(2009) | WPP<br>(2008) | Riley file    | HMD<br>(2013) | HMD<br>(2011) | Interpolated | Estimate<br>based on<br>age-<br>specific<br>mortality | Gapminder<br>guesstimate | Vallin et<br>al.<br>(2002) |
|-----------------------|----------------|---------------|---------------|---------------|---------------|---------------|---------------|--------------|-------------------------------------------------------|--------------------------|----------------------------|
| Paraguay              | 1970-2009      | 1950-1969     |               |               |               |               |               |              |                                                       |                          |                            |
| Peru                  | 1970-2009      | 1950-1969     |               |               |               |               |               |              |                                                       |                          |                            |
| Philippines           | 1970-2009      | 1950-1969     |               |               |               |               |               |              |                                                       |                          |                            |
| Poland                | 1970-2009      |               | 1958-1969     | 1950-1957     |               |               |               |              |                                                       |                          |                            |
| Portugal              | 1970-2009      |               | 1950-1969     |               |               |               |               |              |                                                       |                          |                            |
| Qatar                 | 1970-2009      | 1950-1969     |               |               |               |               |               |              |                                                       |                          |                            |
| Romania               | 1970-2009      | 1950-1969     |               |               |               |               |               |              |                                                       |                          |                            |
| Russia                | 1970-2009      |               | 1959-1969     |               | 1950-1958 (7) |               |               |              |                                                       |                          |                            |
| Rwanda                | 1970-2009      |               |               | 1950-1969     |               |               |               |              |                                                       |                          |                            |
| Samoa                 | 1970-2009      | 1950-1969     |               |               |               |               |               |              |                                                       |                          |                            |
| Sao Tome and Principe | 1970-2009      | 1950-1969     |               |               |               |               |               |              |                                                       |                          |                            |
| Saudi Arabia          | 1970-2009      | 1950-1969     |               |               |               |               |               |              |                                                       |                          |                            |
| Senegal               | 1970-2009      | 1950-1969     |               |               |               |               |               |              |                                                       |                          |                            |
| Serbia                | 1970-2009      | 1950-1969     |               |               |               |               |               |              |                                                       |                          |                            |
| Seychelles            | 1970-2009      | 1950-1969     |               |               |               |               |               |              |                                                       |                          |                            |
| Sierra Leone          | 1970-2009      | 1950-1969     |               |               |               |               |               |              |                                                       |                          |                            |
| Singapore             | 1970-2009      | 1950-1969     |               |               |               |               |               |              |                                                       |                          |                            |
| Slovak Republic       | 1970-2009      |               | 1950-1969     |               |               |               |               |              |                                                       |                          |                            |
| Slovenia              | 1970-2009      |               |               | 1950-1969     |               |               |               |              |                                                       |                          |                            |
| Solomon Islands       | 1970-2009      | 1950-1969     |               |               |               |               |               |              |                                                       |                          |                            |
| Somalia               | 1970-2009      | 1950-1969     |               |               |               |               |               |              |                                                       |                          |                            |
| South Africa          | 1970-2009      | 1950-1969     |               |               |               |               |               |              |                                                       |                          |                            |
| Spain                 | 1970-2009      |               | 1950-1969     |               |               |               |               |              |                                                       |                          |                            |
| Sri Lanka             | 1970-2009      | 1950-1969     |               |               |               |               |               |              |                                                       |                          |                            |
| Sudan                 | 1970-2009      | 1950-1969     |               |               |               |               |               |              |                                                       |                          |                            |
| Suriname              | 1970-2009      | 1950-1969     |               |               |               |               |               |              |                                                       |                          |                            |
| Swaziland             | 1970-2009      | 1950-1969     |               |               |               |               |               |              |                                                       |                          |                            |
| Sweden                | 1970-2009      |               | 1950-1969     |               |               |               |               |              |                                                       |                          |                            |
| Switzerland           | 1970-2009      |               | 1950-1969     |               |               |               |               |              |                                                       |                          |                            |
| Syria                 | 1970-2009      | 1950-1969     |               |               |               |               |               |              |                                                       |                          |                            |
| Tajikistan            | 1970-2009      | 1950-1969     |               |               |               |               |               |              |                                                       |                          |                            |
| Tanzania              | 1970-2009      | 1950-1969     |               |               |               |               |               |              |                                                       |                          |                            |

| Country              | IHME<br>(2014) | WPP<br>(2012) | HMD<br>(2009) | WPP<br>(2008) | Riley file | HMD<br>(2013) | HMD<br>(2011) | Interpolated | Estimate<br>based on<br>age-<br>specific<br>mortality | Gapminder<br>guesstimate | Vallin et<br>al.<br>(2002) |
|----------------------|----------------|---------------|---------------|---------------|------------|---------------|---------------|--------------|-------------------------------------------------------|--------------------------|----------------------------|
| Thailand             | 1970-2009      | 1950-1969     |               |               |            |               |               |              |                                                       |                          |                            |
| Timor-Leste          | 1970-2009      | 1950-1969     |               |               |            |               |               |              |                                                       |                          |                            |
| Togo                 | 1970-2009      | 1950-1969     |               |               |            |               |               |              |                                                       |                          |                            |
| Tonga                | 1970-2009      | 1950-1969     |               |               |            |               |               |              |                                                       |                          |                            |
| Trinidad and Tobago  | 1970-2009      | 1950-1969     |               |               |            |               |               |              |                                                       |                          |                            |
| Tunisia              | 1970-2009      | 1950-1969     |               |               |            |               |               |              |                                                       |                          |                            |
| Turkey               | 1970-2009      | 1950-1969     |               |               |            |               |               |              |                                                       |                          |                            |
| Turkmenistan         | 1970-2009      | 1950-1969     |               |               |            |               |               |              |                                                       |                          |                            |
| Uganda               | 1970-2009      | 1950-1969     |               |               |            |               |               |              |                                                       |                          |                            |
| Ukraine              | 1970-2009      |               | 1959-1969     |               |            |               |               |              |                                                       |                          | 1950-1958                  |
| United Arab Emirates | 1970-2009      | 1950-1969     |               |               |            |               |               |              |                                                       |                          |                            |
| United Kingdom       | 1970-2009      |               | 1950-1969     |               |            |               |               |              |                                                       |                          |                            |
| United States        | 1970-2009      |               |               |               |            |               | 1950-1969     |              |                                                       |                          |                            |
| Uruguay              | 1970-2009      | 1950-1969     |               |               |            |               |               |              |                                                       |                          |                            |
| Uzbekistan           | 1970-2009      | 1950-1969     |               |               |            |               |               |              |                                                       |                          |                            |
| Vanuatu              | 1970-2009      | 1950-1969     |               |               |            |               |               |              |                                                       |                          |                            |
| Venezuela            | 1970-2009      | 1950-1969     |               |               |            |               |               |              |                                                       |                          |                            |
| Vietnam              | 1970-2009      | 1950-1969     |               |               |            |               |               |              |                                                       |                          |                            |
| Zambia               | 1970-2009      | 1950-1969     |               |               |            |               |               |              |                                                       |                          |                            |
| Zimbabwe             | 1970-2009      | 1950-1969     |               |               |            |               |               |              |                                                       |                          |                            |

Source: [Gapminder Documentation 004 \(GD004\) - version 8 \(2016\)](#)

### *Life Expectancy at Birth*

According to Gapminder Documentation 004 (GD004) - version 8 [1], 173 countries used in the analysis, LEB sources were (sorted by number of country-year observations):

1. IHME [2] (2014), 6,920 country-year observations. "Institute for Health Metrics and Evaluation – University of Washington." Retrieved file IHME\_GBD\_2013\_LIFE\_EXPECTANCY\_1970\_2013\_Y2014M12D17 from <https://cloud.ihme.washington.edu/index.php/s/b89390325f728bbd99de0356d3be6900>.
2. WPP [3] (2012), 2,715 country-year observations. "United Nations Population Division. World Population Prospects: The 2012 Revision. Life expectancy at birth, both sexes."
3. HMD [4] (2009), 517 country-year observations. "The Human Mortality Database. Joint project of the Department of Demography at the University of California, Berkeley, USA, and at the Max Planck Institute for Demographic Research in Rostock. Downloaded in 2009."
4. WPP [5] (2008), 116 country-year observations. "United Nations Population Division. World Population Prospects: The 2006 Revision. Life expectancy at birth, both sexes."
5. Riley file, 26 country-year observations. "Estimates from in total over 700 different sources, compiled by Professor James Riley, and described in [www.lifetable.de/RileyBib.htm](http://www.lifetable.de/RileyBib.htm)". Table A-1 shows a detail explanation of the estimate (Notes).
6. HMD [6] (2013), 25 country-year observations. "The Human Mortality Database. Joint project of the Department of Demography at the University of California, Berkeley, USA, and at the Max Planck Institute for Demographic Research in Rostock. Downloaded in 2013, July. There have been some additions and some minor revisions since 2011."
7. HMD [7] (2011), 20 country-year observations. "The Human Mortality Database. Joint project of the Department of Demography at the University of California, Berkeley, USA, and at the Max Planck Institute for Demographic Research in Rostock. Downloaded in 2011. There has been some additions and some minor revisions since 2009."
8. Interpolated, 13 country-year observations. Table A-1 shows a detail explanation of the estimate (Notes).
9. Gapminder guesstimate, 10 country-year observations. Table A-1 shows a detail explanation of the estimate (Notes).
10. Estimate based on age-specific mortality from Estonian Interuniversity Population Research Centre (database), 9 country-year observations. Table A-1 shows a detail explanation of the estimate (Notes).
11. Vallin et al. (2002), 9 country-year observations. "Vallin et al (2002), "A new estimate of Ukrainian population losses during the crises of the 1930s and 1940s". Population Studies: A Journal of Demography, Volume 56, Issue 3."

### *Real GDP per capita PPP 2005*

According to Data in Gapminder World [8], information was retrieved from:

Alan Heston, Robert Summers and Bettina Aten [8], Penn World Table Version 7.1, Center for International Comparisons of Production, Income and Prices at the University of Pennsylvania, July 2012. Version: September, 2012

### *Children per woman (total fertility)*

According to Gapminder Documentation 008 (GD008) - version 6 [9], Total Fertility Rate (TFR) main source of data is the UN fertility dataset, which covers the period between 1950 and 2008. This version, has the latest UN-population World Population Prospect, as of 2015 October.

For the 173 countries used in the analysis, TFR sources were (sorted by number of country-year observations):

1. WPP [10] (2013), 9,604 country-year observations (equivalent to 92.5% of total observations). "United Nations, Department of Economic and Social Affairs, Population Division (2013). World Population Prospects: The 2012 Revision, CD-ROM Edition. File INT/1: Interpolated demographic indicators by major area, region and country, annually for 1950-2100." Retrieved in August 2013.
2. HFD (2013), 177 country-year observations. "Human Fertility Database. Max Planck Institute for Demographic Research (Germany) and Vienna Institute of Demography (Austria)." Available at: <http://www.humanfertility.org>
3. HFD (2012), 60 country-year observations. "Human Fertility Database. Max Planck Institute for Demographic Research (Germany) and Vienna Institute of Demography (Austria)." Retrieved in September 2012. Available at: [www.humanfertility.org](http://www.humanfertility.org)
4. Statistics Denmark (2013), 60 country-year observations. "Statistics Denmark (2013). Somewhere on their homepage: "FOD3: Age-specific fertility rates, total fertility rates, gross and net reproduction rate"." Retrieved in August 2013. Available at: <http://www.statbank.dk/statbank5a/default.asp?w=1280>



5. Statistics Finland (2013), 60 country-year observations. "Statistics Finland (2013), on-line table "Total fertility rate 1776-2012"." Retrieved in August 2013.
6. ABS (2008), 57 country-year observations. "Australian Bureau of Statistics (2008). Somewhere on their homepage: "3105.0.65.001 Australian Historical Population Statistics, 2008. Table 5. Births"." Available at: <http://www.abs.gov.au/>
7. Converted from CBR, 55 country-year observations.
8. Statistics Netherlands (2009), 55 country-year observations. "statistics Netherlands (2009). Somewhere on homepage." Available at: <http://statline.cbs.nl/StatWeb>
9. HFD (2015), 51 country-year observations. "Human Fertility Database. Max Planck Institute for Demographic Research (Germany) and Vienna Institute of Demography (Austria)." Retrieved in January 2015. Available at: <http://www.humanfertility.org>
10. Statistics Norway (2013), 42 country-year observations. "Statistics Norway (2013). Somewhere on homepage: "Table: 04232: Total fertility rate, women (C)"." Retrieved in August 2013. Available at: <https://www.ssb.no/statistikkbanken/>
11. e2307, 33 country-year observations. "Coale & Li (1987), "Basic data on fertility in the provinces of China, 1940-82", Papers of the east-west population institute." Available at: [http://scholarspace.manoa.hawaii.edu/bitstream/handle/10125/22799/PapersOfTheEastWestPopulationInstituteNO.104BasicDataOnFertilityInTheProvincesOfChina1940-821987\[pdf\].PDF?sequence=1](http://scholarspace.manoa.hawaii.edu/bitstream/handle/10125/22799/PapersOfTheEastWestPopulationInstituteNO.104BasicDataOnFertilityInTheProvincesOfChina1940-821987[pdf].PDF?sequence=1)
12. Statistics Singapore, 29 country-year observations.
13. Chesnais, 18 country-year observations. "Chesnais, Jean-Claude. (1992) The Demographic Transition: Stages, Patterns, and Economic Implications. A Longitudinal Study of Sixty-Seven Countries Covering the Period 1720-1984 Jean-Claude Chesnais Oxford : Clarendon Press , 1992"
14. Statistics Armenia (2013), 10 country-year observations. "Statistics Canada (2013). Table102-4505 - Crude birth rate, age-specific and total fertility rates (live births), Canada, provinces and territories, annual (rate), CANSIM (database). (accessed: 2013-08-23)." Retrieved in August 2013. Available at: <http://www5.statcan.gc.ca/cansim/a05?lang=eng&id=1024505&paSer=&pattern=102-4505&stByVal=1&csid=>
15. Zakharov, 9 country-year observations. "Zakharov (2008); "Russian federation: from the first to second demographic transition"; Demographic research 19 (24)." Available at: <http://www.demographic-research.org/volumes/vol19/24/>
16. Interpolated, 6 country-year observations.  
Romania (1950-1955):  
GD008: "WPP indicate lower values in the 1950s and implies a sharp discontinuity 1949-50."
17. Statistics Armenia (2009), 5 country-year observations. "Statistics Canada (2009), somewhere on their homepage: "Section B: Vital Statistics and Health"." Available at: <http://www.statcan.gc.ca/pub/11-516-x/pdf/5500093-eng.pdf>
18. Statistics Netherlands (2013), 5 country-year observations. "Statistics Netherlands (2013). Somewhere on homepage." Retrieved in August 2013. Available at: <http://statline.cbs.nl>
19. ABS (2013), 3 country-year observations. "Australian Bureau of Statistics (2013), Somewhere on homepage: "3301.0 - Births, Australia, 2011. Table 11.1 Age-specific fertility rates and total fertility rate, Single year of age of mother–Australia–1975 to 2011"." Retrieved in August 2013. Available at: <http://www.abs.gov.au/AUSSTATS/abs@.nsf/DetailsPage/3301.02011?OpenDocument>
20. Statistics Canada (2013), 2 country-year observations. "Statistics Canada (2013). Table102-4505 - Crude birth rate, age-specific and total fertility rates (live births), Canada, provinces and territories, annual (rate), CANSIM (database). (accessed: 2013-08-23)." Retrieved in August 2013. Available at: <http://www5.statcan.gc.ca/cansim/a05?lang=eng&id=1024505&paSer=&pattern=102-4505&stByVal=1&csid=>

#### *Population density (per square kilometer)*

According to [Data in Gapminder World](#) [11], information was retrieved from:

UN Population Division. World Population Prospects, the 2010 Revision. Population density (per square km).  
Version: August, 2013

#### *Per capita CO2 emissions (metric tons of CO2)*

According to [Data in Gapminder World](#) [12], information was retrieved from:

CDIAC (Carbon Dioxide Information Analysis Center). CDIAC (Carbon Dioxide Information Analysis Center) - nation.1751\_2009.csv. [http://cdiac.ornl.gov/trends/emis/meth\\_reg.html](http://cdiac.ornl.gov/trends/emis/meth_reg.html). Version: January, 2015.

*Estimated HIV Prevalence % - (Ages 15-49)*

According to Data in Gapminder World [13], information was retrieved from:

UNAIDS/WHO. UNAIDS online database, Estimated HIV Prevalence % - (Ages 15-49). Version: April, 2013.

For a detail description on HIV indicators look on Gapminder Documentation 006 (GD006) – version 1.

## 2. Tables

*Table A-2-1: List of countries included in the analysis, when HIV is not included as a control variable*

| No. | Country                | ISO Code | No. | Country          | ISO Code |
|-----|------------------------|----------|-----|------------------|----------|
| 1   | Afghanistan            | AFG      | 88  | Lebanon          | LBN      |
| 2   | Angola                 | AGO      | 89  | Liberia          | LBR      |
| 3   | Albania                | ALB      | 90  | Libya            | LBY      |
| 4   | United Arab Emirates   | ARE      | 91  | Sri Lanka        | LKA      |
| 5   | Argentina              | ARG      | 92  | Lesotho          | LSO      |
| 6   | Armenia                | ARM      | 93  | Lithuania        | LTU      |
| 7   | Antigua and Barbuda    | ATG      | 94  | Luxembourg       | LUX      |
| 8   | Australia              | AUS      | 95  | Latvia           | LVA      |
| 9   | Austria                | AUT      | 96  | Macao, China     | MAC      |
| 10  | Azerbaijan             | AZE      | 97  | Morocco          | MAR      |
| 11  | Burundi                | BDI      | 98  | Moldova          | MDA      |
| 12  | Belgium                | BEL      | 99  | Madagascar       | MDG      |
| 13  | Benin                  | BEN      | 100 | Maldives         | MDV      |
| 14  | Burkina Faso           | BFA      | 101 | Mexico           | MEX      |
| 15  | Bangladesh             | BGD      | 102 | Macedonia, FYR   | MKD      |
| 16  | Bulgaria               | BGR      | 103 | Mali             | MLI      |
| 17  | Bahrain                | BHR      | 104 | Malta            | MLT      |
| 18  | Bahamas                | BHS      | 105 | Montenegro       | MNE      |
| 19  | Bosnia and Herzegovina | BIH      | 106 | Mongolia         | MNG      |
| 20  | Belarus                | BLR      | 107 | Mozambique       | MOZ      |
| 21  | Belize                 | BLZ      | 108 | Mauritania       | MRT      |
| 22  | Bolivia                | BOL      | 109 | Mauritius        | MUS      |
| 23  | Brazil                 | BRA      | 110 | Malawi           | MWI      |
| 24  | Barbados               | BRB      | 111 | Malaysia         | MYS      |
| 25  | Brunei                 | BRN      | 112 | Namibia          | NAM      |
| 26  | Bhutan                 | BTN      | 113 | Niger            | NER      |
| 27  | Botswana               | BWA      | 114 | Nigeria          | NGA      |
| 28  | Canada                 | CAN      | 115 | Nicaragua        | NIC      |
| 29  | Switzerland            | CHE      | 116 | Netherlands      | NLD      |
| 30  | Chile                  | CHL      | 117 | Norway           | NOR      |
| 31  | China                  | CHN      | 118 | Nepal            | NPL      |
| 32  | Cote d'Ivoire          | CIV      | 119 | New Zealand      | NZL      |
| 33  | Cameroon               | CMR      | 120 | Oman             | OMN      |
| 34  | Congo, Rep.            | COG      | 121 | Pakistan         | PAK      |
| 35  | Colombia               | COL      | 122 | Panama           | PAN      |
| 36  | Comoros                | COM      | 123 | Peru             | PER      |
| 37  | Cape Verde             | CPV      | 124 | Philippines      | PHL      |
| 38  | Costa Rica             | CRI      | 125 | Papua New Guinea | PNG      |
| 39  | Cuba                   | CUB      | 126 | Poland           | POL      |
| 40  | Cyprus                 | CYP      | 127 | Portugal         | PRT      |
| 41  | Germany                | DEU      | 128 | Paraguay         | PRY      |
| 42  | Djibouti               | DJI      | 129 | Qatar            | QAT      |
| 43  | Denmark                | DNK      | 130 | Romania          | ROM      |
| 44  | Algeria                | DZA      | 131 | Russia           | RUS      |
| 45  | Ecuador                | ECU      | 132 | Rwanda           | RWA      |
| 46  | Egypt                  | EGY      | 133 | Saudi Arabia     | SAU      |
| 47  | Eritrea                | ERI      | 134 | Sudan            | SDN      |

| No. | Country               | ISO Code | No. | Country               | ISO Code |
|-----|-----------------------|----------|-----|-----------------------|----------|
| 48  | Spain                 | ESP      | 135 | Senegal               | SEN      |
| 49  | Estonia               | EST      | 136 | Singapore             | SGP      |
| 50  | Ethiopia              | ETH      | 137 | Solomon Islands       | SLB      |
| 51  | Finland               | FIN      | 138 | Sierra Leone          | SLE      |
| 52  | Fiji                  | FJI      | 139 | El Salvador           | SLV      |
| 53  | France                | FRA      | 140 | Somalia               | SOM      |
| 54  | Micronesia, Fed. Sts. | FSM      | 141 | Serbia                | SRB      |
| 55  | Gabon                 | GAB      | 142 | Sao Tome and Principe | STP      |
| 56  | United Kingdom        | GBR      | 143 | Suriname              | SUR      |
| 57  | Georgia               | GEO      | 144 | Slovak Republic       | SVK      |
| 58  | Ghana                 | GHA      | 145 | Slovenia              | SVN      |
| 59  | Guinea                | GIN      | 146 | Sweden                | SWE      |
| 60  | Gambia                | GMB      | 147 | Swaziland             | SWZ      |
| 61  | Guinea-Bissau         | GNB      | 148 | Seychelles            | SYC      |
| 62  | Equatorial Guinea     | GNQ      | 149 | Syria                 | SYR      |
| 63  | Greece                | GRC      | 150 | Chad                  | TCD      |
| 64  | Grenada               | GRD      | 151 | Togo                  | TGO      |
| 65  | Guatemala             | GTM      | 152 | Thailand              | THA      |
| 66  | Guyana                | GUY      | 153 | Tajikistan            | TJK      |
| 67  | Hong Kong, China      | HKG      | 154 | Turkmenistan          | TKM      |
| 68  | Honduras              | HND      | 155 | Timor-Leste           | TLS      |
| 69  | Croatia               | HRV      | 156 | Tonga                 | TON      |
| 70  | Haiti                 | HTI      | 157 | Trinidad and Tobago   | TTO      |
| 71  | Hungary               | HUN      | 158 | Tunisia               | TUN      |
| 72  | Indonesia             | IDN      | 159 | Turkey                | TUR      |
| 73  | India                 | IND      | 160 | Tanzania              | TZA      |
| 74  | Ireland               | IRL      | 161 | Uganda                | UGA      |
| 75  | Iran                  | IRN      | 162 | Ukraine               | UKR      |
| 76  | Iraq                  | IRQ      | 163 | Uruguay               | URY      |
| 77  | Iceland               | ISL      | 164 | United States         | USA      |
| 78  | Israel                | ISR      | 165 | Uzbekistan            | UZB      |
| 79  | Italy                 | ITA      | 166 | Venezuela             | VEN      |
| 80  | Jamaica               | JAM      | 167 | Vietnam               | VNM      |
| 81  | Jordan                | JOR      | 168 | Vanuatu               | VUT      |
| 82  | Japan                 | JPN      | 169 | Samoa                 | WSM      |
| 83  | Kazakhstan            | KAZ      | 170 | South Africa          | ZAF      |
| 84  | Kenya                 | KEN      | 171 | Congo, Dem. Rep.      | ZAR      |
| 85  | Cambodia              | KHM      | 172 | Zambia                | ZMB      |
| 86  | Kiribati              | KIR      | 173 | Zimbabwe              | ZWE      |
| 87  | Kuwait                | KWT      |     |                       |          |

*Table A-2-2: List of countries included in the analysis, when HIV is included as a control variable*

| No. | Country           | ISO Code | No. | Country          | ISO Code |
|-----|-------------------|----------|-----|------------------|----------|
| 1   | Angola            | AGO      | 71  | Liberia          | LBR      |
| 2   | Argentina         | ARG      | 72  | Sri Lanka        | LKA      |
| 3   | Armenia           | ARM      | 73  | Lesotho          | LSO      |
| 4   | Australia         | AUS      | 74  | Lithuania        | LTU      |
| 5   | Austria           | AUT      | 75  | Luxembourg       | LUX      |
| 6   | Azerbaijan        | AZE      | 76  | Latvia           | LVA      |
| 7   | Burundi           | BDI      | 77  | Morocco          | MAR      |
| 8   | Belgium           | BEL      | 78  | Moldova          | MDA      |
| 9   | Benin             | BEN      | 79  | Madagascar       | MDG      |
| 10  | Burkina Faso      | BFA      | 80  | Maldives         | MDV      |
| 11  | Bangladesh        | BGD      | 81  | Mexico           | MEX      |
| 12  | Bulgaria          | BGR      | 82  | Mali             | MLI      |
| 13  | Bahamas           | BHS      | 83  | Malta            | MLT      |
| 14  | Belarus           | BLR      | 84  | Mongolia         | MNG      |
| 15  | Belize            | BLZ      | 85  | Mozambique       | MOZ      |
| 16  | Bolivia           | BOL      | 86  | Mauritania       | MRT      |
| 17  | Brazil            | BRA      | 87  | Mauritius        | MUS      |
| 18  | Barbados          | BRB      | 88  | Malawi           | MWI      |
| 19  | Bhutan            | BTN      | 89  | Malaysia         | MYS      |
| 20  | Botswana          | BWA      | 90  | Namibia          | NAM      |
| 21  | Canada            | CAN      | 91  | Niger            | NER      |
| 22  | Switzerland       | CHE      | 92  | Nigeria          | NGA      |
| 23  | Chile             | CHL      | 93  | Nicaragua        | NIC      |
| 24  | Cote d'Ivoire     | CIV      | 94  | Netherlands      | NLD      |
| 25  | Cameroon          | CMR      | 95  | Norway           | NOR      |
| 26  | Congo, Rep.       | COG      | 96  | Nepal            | NPL      |
| 27  | Colombia          | COL      | 97  | New Zealand      | NZL      |
| 28  | Comoros           | COM      | 98  | Oman             | OMN      |
| 29  | Costa Rica        | CRI      | 99  | Pakistan         | PAK      |
| 30  | Cuba              | CUB      | 100 | Panama           | PAN      |
| 31  | Germany           | DEU      | 101 | Peru             | PER      |
| 32  | Djibouti          | DJI      | 102 | Philippines      | PHL      |
| 33  | Denmark           | DNK      | 103 | Papua New Guinea | PNG      |
| 34  | Algeria           | DZA      | 104 | Poland           | POL      |
| 35  | Ecuador           | ECU      | 105 | Portugal         | PRT      |
| 36  | Egypt             | EGY      | 106 | Paraguay         | PRY      |
| 37  | Eritrea           | ERI      | 107 | Qatar            | QAT      |
| 38  | Spain             | ESP      | 108 | Romania          | ROM      |
| 39  | Estonia           | EST      | 109 | Russia           | RUS      |
| 40  | Finland           | FIN      | 110 | Rwanda           | RWA      |
| 41  | Fiji              | FJI      | 111 | Sudan            | SDN      |
| 42  | France            | FRA      | 112 | Senegal          | SEN      |
| 43  | Gabon             | GAB      | 113 | Singapore        | SGP      |
| 44  | United Kingdom    | GBR      | 114 | Sierra Leone     | SLE      |
| 45  | Georgia           | GEO      | 115 | El Salvador      | SLV      |
| 46  | Ghana             | GHA      | 116 | Somalia          | SOM      |
| 47  | Guinea            | GIN      | 117 | Serbia           | SRB      |
| 48  | Gambia            | GMB      | 118 | Suriname         | SUR      |
| 49  | Guinea-Bissau     | GNB      | 119 | Slovak Republic  | SVK      |
| 50  | Equatorial Guinea | GNQ      | 120 | Slovenia         | SVN      |
| 51  | Greece            | GRC      | 121 | Sweden           | SWE      |
| 52  | Guatemala         | GTM      | 122 | Swaziland        | SWZ      |
| 53  | Guyana            | GUY      | 123 | Chad             | TCD      |
| 54  | Honduras          | HND      | 124 | Togo             | TGO      |

| No. | Country    | ISO Code | No. | Country             | ISO Code |
|-----|------------|----------|-----|---------------------|----------|
| 55  | Croatia    | HRV      | 125 | Thailand            | THA      |
| 56  | Haiti      | HTI      | 126 | Tajikistan          | TJK      |
| 57  | Hungary    | HUN      | 127 | Trinidad and Tobago | TTO      |
| 58  | Indonesia  | IDN      | 128 | Tunisia             | TUN      |
| 59  | India      | IND      | 129 | Turkey              | TUR      |
| 60  | Ireland    | IRL      | 130 | Tanzania            | TZA      |
| 61  | Iran       | IRN      | 131 | Uganda              | UGA      |
| 62  | Iceland    | ISL      | 132 | Ukraine             | UKR      |
| 63  | Israel     | ISR      | 133 | Uruguay             | URY      |
| 64  | Italy      | ITA      | 134 | United States       | USA      |
| 65  | Jamaica    | JAM      | 135 | Uzbekistan          | UZB      |
| 66  | Japan      | JPN      | 136 | Vietnam             | VNM      |
| 67  | Kazakhstan | KAZ      | 137 | South Africa        | ZAF      |
| 68  | Kenya      | KEN      | 138 | Zambia              | ZMB      |
| 69  | Cambodia   | KHM      | 139 | Zimbabwe            | ZWE      |
| 70  | Lebanon    | LBN      |     |                     |          |

**Table A-2-3: List of countries by strata using a representative year for each decade, during the analysis countries were re-stratified to each LEB stratum every single year**

|                                     | Year 1955         | Year 1965         | Year 1975         | Year 1985     | Year 1995         | Year 2005     |
|-------------------------------------|-------------------|-------------------|-------------------|---------------|-------------------|---------------|
| <b>Lowest Stratum (LEB &lt; 51)</b> | Algeria           | Angola            | Angola            | Angola        | Angola            | Guinea-Bissau |
|                                     | Angola            | Bangladesh        | Benin             | Burundi       | Burundi           | Lesotho       |
|                                     | Bangladesh        | Benin             | Bhutan            | Eritrea       | Equatorial Guinea | Malawi        |
|                                     | Benin             | Bhutan            | Burkina Faso      | Guinea        | Malawi            | Swaziland     |
|                                     | Bhutan            | Bolivia           | Burundi           | Guinea-Bissau | Mali              | Zambia        |
|                                     | Bolivia           | Burkina Faso      | Cambodia          | Malawi        | Niger             | Zimbabwe      |
|                                     | Burkina Faso      | Burundi           | Equatorial Guinea | Mali          | Rwanda            |               |
|                                     | Burundi           | Cambodia          | Eritrea           | Mozambique    | Uganda            |               |
|                                     | Cambodia          | Cameroon          | Guinea            | Niger         | Zambia            |               |
|                                     | Cameroon          | Chad              | Guinea-Bissau     | Rwanda        |                   |               |
|                                     | Chad              | Comoros           | Haiti             | Sierra Leone  |                   |               |
|                                     | Comoros           | Congo, Rep.       | India             |               |                   |               |
|                                     | Congo, Rep.       | Cote d'Ivoire     | Liberia           |               |                   |               |
|                                     | Cote d'Ivoire     | Egypt             | Malawi            |               |                   |               |
|                                     | Djibouti          | Equatorial Guinea | Mali              |               |                   |               |
|                                     | Egypt             | Eritrea           | Mozambique        |               |                   |               |
|                                     | El Salvador       | Gabon             | Nepal             |               |                   |               |
|                                     | Equatorial Guinea | Gambia            | Niger             |               |                   |               |
|                                     | Eritrea           | Guatemala         | Rwanda            |               |                   |               |
|                                     | Gabon             | Guinea            | Senegal           |               |                   |               |
|                                     | Gambia            | Guinea-Bissau     | Sierra Leone      |               |                   |               |
|                                     | Ghana             | Haiti             | Somalia           |               |                   |               |
|                                     | Guatemala         | India             |                   |               |                   |               |
|                                     | Guinea            | Indonesia         |                   |               |                   |               |
|                                     | Guinea-Bissau     | Liberia           |                   |               |                   |               |
|                                     | Haiti             | Madagascar        |                   |               |                   |               |
|                                     | Honduras          | Malawi            |                   |               |                   |               |
|                                     | India             | Maldives          |                   |               |                   |               |
|                                     | Indonesia         | Mali              |                   |               |                   |               |
|                                     | Iran              | Mozambique        |                   |               |                   |               |
|                                     | Kenya             | Nepal             |                   |               |                   |               |
|                                     | Lesotho           | Niger             |                   |               |                   |               |
|                                     | Liberia           | Nigeria           |                   |               |                   |               |
|                                     | Madagascar        | Oman              |                   |               |                   |               |
|                                     | Malawi            | Pakistan          |                   |               |                   |               |
|                                     | Maldives          | Peru              |                   |               |                   |               |
|                                     | Mali              | Rwanda            |                   |               |                   |               |
|                                     | Mauritania        | Senegal           |                   |               |                   |               |
|                                     | Mongolia          | Sierra Leone      |                   |               |                   |               |
|                                     | Morocco           | Somalia           |                   |               |                   |               |
|                                     | Mozambique        | Togo              |                   |               |                   |               |
|                                     | Namibia           | Uganda            |                   |               |                   |               |

|                                      | Year 1955        | Year 1965        | Year 1975     | Year 1985         | Year 1995     | Year 2005         |
|--------------------------------------|------------------|------------------|---------------|-------------------|---------------|-------------------|
|                                      | Nepal            |                  |               |                   |               |                   |
|                                      | Nicaragua        |                  |               |                   |               |                   |
|                                      | Niger            |                  |               |                   |               |                   |
|                                      | Nigeria          |                  |               |                   |               |                   |
|                                      | Oman             |                  |               |                   |               |                   |
|                                      | Pakistan         |                  |               |                   |               |                   |
|                                      | Papua New Guinea |                  |               |                   |               |                   |
|                                      | Peru             |                  |               |                   |               |                   |
|                                      | Rwanda           |                  |               |                   |               |                   |
|                                      | Senegal          |                  |               |                   |               |                   |
|                                      | Sierra Leone     |                  |               |                   |               |                   |
|                                      | Somalia          |                  |               |                   |               |                   |
|                                      | South Africa     |                  |               |                   |               |                   |
|                                      | Sudan            |                  |               |                   |               |                   |
|                                      | Swaziland        |                  |               |                   |               |                   |
|                                      | Tanzania         |                  |               |                   |               |                   |
|                                      | Togo             |                  |               |                   |               |                   |
|                                      | Tunisia          |                  |               |                   |               |                   |
|                                      | Turkey           |                  |               |                   |               |                   |
|                                      | Uganda           |                  |               |                   |               |                   |
|                                      | Zambia           |                  |               |                   |               |                   |
| <b>Stratum II (51 ≤ LEB &lt; 61)</b> | Armenia          | Algeria          | Algeria       | Bangladesh        | Benin         | Angola            |
|                                      | Azerbaijan       | Azerbaijan       | Bangladesh    | Benin             | Burkina Faso  | Botswana          |
|                                      | Bahamas          | Botswana         | Bolivia       | Bhutan            | Cambodia      | Burkina Faso      |
|                                      | Belize           | Brazil           | Cameroon      | Bolivia           | Cameroon      | Burundi           |
|                                      | Botswana         | Chile            | Chad          | Burkina Faso      | Chad          | Cameroon          |
|                                      | Brazil           | Djibouti         | Comoros       | Cambodia          | Comoros       | Chad              |
|                                      | Chile            | Ecuador          | Congo, Rep.   | Cameroon          | Congo, Rep.   | Congo, Rep.       |
|                                      | Colombia         | El Salvador      | Cote d'Ivoire | Chad              | Cote d'Ivoire | Cote d'Ivoire     |
|                                      | Ecuador          | Ghana            | Djibouti      | Comoros           | Djibouti      | Djibouti          |
|                                      | Fiji             | Honduras         | Egypt         | Congo, Rep.       | Eritrea       | Equatorial Guinea |
|                                      | Georgia          | Iran             | Gabon         | Cote d'Ivoire     | Gabon         | Eritrea           |
|                                      | Guyana           | Kazakhstan       | Gambia        | Djibouti          | Gambia        | Gabon             |
|                                      | Jamaica          | Kenya            | Ghana         | Equatorial Guinea | Ghana         | Guinea            |
|                                      | Kazakhstan       | Lesotho          | Guatemala     | Gabon             | Guinea        | Haiti             |
|                                      | Malaysia         | Mauritania       | Indonesia     | Gambia            | Guinea-Bissau | Kenya             |
|                                      | Mauritius        | Mexico           | Iran          | Ghana             | Haiti         | Liberia           |
|                                      | Mexico           | Mongolia         | Kenya         | Haiti             | India         | Mali              |
|                                      | Moldova          | Morocco          | Lesotho       | India             | Kenya         | Mozambique        |
|                                      | Panama           | Namibia          | Madagascar    | Lesotho           | Lesotho       | Namibia           |
|                                      | Philippines      | Nicaragua        | Maldives      | Liberia           | Liberia       | Niger             |
|                                      | Qatar            | Papua New Guinea | Mauritania    | Madagascar        | Madagascar    | Nigeria           |
|                                      | Serbia           | South Africa     | Mongolia      | Mauritania        | Mongolia      | Papua New Guinea  |
|                                      | Sri Lanka        | Sudan            | Morocco       | Mongolia          | Mozambique    | Rwanda            |
|                                      | Suriname         | Swaziland        | Namibia       | Nepal             | Namibia       | Sierra Leone      |



|                                                              | Year 1955           | Year 1965  | Year 1975        | Year 1985        | Year 1995        | Year 2005    |
|--------------------------------------------------------------|---------------------|------------|------------------|------------------|------------------|--------------|
|                                                              | Tajikistan          | Tajikistan | Nigeria          | Nigeria          | Nigeria          | Somalia      |
|                                                              | Thailand            | Tanzania   | Oman             | Papua New Guinea | Papua New Guinea | South Africa |
|                                                              | Trinidad and Tobago | Tunisia    | Pakistan         | Senegal          | Senegal          | Tanzania     |
|                                                              | Uzbekistan          | Turkey     | Papua New Guinea | Somalia          | Sierra Leone     | Togo         |
|                                                              | Vietnam             | Uzbekistan | South Africa     | Sudan            | Somalia          | Uganda       |
|                                                              | Zimbabwe            | Vietnam    | Sudan            | Swaziland        | Swaziland        |              |
|                                                              |                     | Zambia     | Swaziland        | Tanzania         | Tanzania         |              |
|                                                              |                     | Zimbabwe   | Tajikistan       | Togo             | Togo             |              |
|                                                              |                     |            | Tanzania         | Uganda           | Zimbabwe         |              |
|                                                              |                     |            | Togo             | Zambia           |                  |              |
|                                                              |                     |            | Turkey           |                  |                  |              |
|                                                              |                     |            | Uganda           |                  |                  |              |
|                                                              |                     |            | Zambia           |                  |                  |              |
|                                                              |                     |            | Zimbabwe         |                  |                  |              |
| <b>Stratum III (<math>61 \leq \text{LEB} &lt; 71</math>)</b> | Argentina           | Argentina  | Argentina        | Algeria          | Armenia          | Azerbaijan   |
|                                                              | Australia           | Armenia    | Armenia          | Armenia          | Azerbaijan       | Bangladesh   |
|                                                              | Austria             | Austria    | Azerbaijan       | Azerbaijan       | Bahamas          | Belarus      |
|                                                              | Barbados            | Bahamas    | Bahamas          | Bahamas          | Bangladesh       | Belize       |
|                                                              | Belarus             | Barbados   | Barbados         | Botswana         | Belarus          | Benin        |
|                                                              | Belgium             | Belgium    | Belize           | Brazil           | Bhutan           | Bhutan       |
|                                                              | Bulgaria            | Belize     | Botswana         | Colombia         | Bolivia          | Bolivia      |
|                                                              | Canada              | Bulgaria   | Brazil           | Ecuador          | Botswana         | Cambodia     |
|                                                              | Costa Rica          | Colombia   | Chile            | Egypt            | Brazil           | Comoros      |
|                                                              | Croatia             | Costa Rica | Colombia         | El Salvador      | Bulgaria         | Egypt        |
|                                                              | Cuba                | Croatia    | Croatia          | Estonia          | Egypt            | Fiji         |
|                                                              | Estonia             | Cuba       | Ecuador          | Fiji             | Estonia          | Gambia       |
|                                                              | Finland             | Fiji       | El Salvador      | Georgia          | Fiji             | Ghana        |
|                                                              | France              | Finland    | Estonia          | Guatemala        | Guatemala        | Guatemala    |
|                                                              | Germany             | Georgia    | Fiji             | Guyana           | Guyana           | Guyana       |
|                                                              | Greece              | Germany    | Georgia          | Honduras         | Honduras         | Honduras     |
|                                                              | Hungary             | Guyana     | Guyana           | Hungary          | Hungary          | India        |
|                                                              | Ireland             | Hungary    | Honduras         | Indonesia        | Indonesia        | Indonesia    |
|                                                              | Israel              | Ireland    | Hungary          | Iran             | Iran             | Kazakhstan   |
|                                                              | Italy               | Israel     | Jamaica          | Kazakhstan       | Kazakhstan       | Latvia       |
|                                                              | Japan               | Italy      | Kazakhstan       | Kenya            | Latvia           | Madagascar   |
|                                                              | Latvia              | Jamaica    | Latvia           | Latvia           | Lithuania        | Mauritania   |
|                                                              | Lebanon             | Japan      | Lebanon          | Lebanon          | Maldives         | Moldova      |
|                                                              | Lithuania           | Lebanon    | Malaysia         | Malaysia         | Mauritania       | Mongolia     |
|                                                              | Luxembourg          | Luxembourg | Mauritius        | Maldives         | Mauritius        | Nepal        |
|                                                              | Malta               | Malaysia   | Mexico           | Mauritius        | Moldova          | Pakistan     |
|                                                              | New Zealand         | Malta      | Moldova          | Mexico           | Morocco          | Philippines  |
|                                                              | Paraguay            | Mauritius  | Nicaragua        | Moldova          | Nepal            | Russia       |
|                                                              | Poland              | Moldova    | Paraguay         | Morocco          | Pakistan         | Senegal      |
|                                                              | Portugal            | Panama     | Peru             | Namibia          | Philippines      | Sudan        |
|                                                              | Romania             | Paraguay   | Philippines      | Nicaragua        | Romania          | Suriname     |

|                                   | Year 1955       | Year 1965           | Year 1975           | Year 1985           | Year 1995           | Year 2005           |
|-----------------------------------|-----------------|---------------------|---------------------|---------------------|---------------------|---------------------|
|                                   | Russia          | Philippines         | Poland              | Oman                | Russia              | Tajikistan          |
|                                   | Singapore       | Poland              | Portugal            | Pakistan            | South Africa        | Trinidad and Tobago |
|                                   | Slovak Republic | Portugal            | Qatar               | Peru                | Sudan               | Ukraine             |
|                                   | Slovenia        | Qatar               | Romania             | Philippines         | Suriname            | Uzbekistan          |
|                                   | Spain           | Romania             | Russia              | Poland              | Tajikistan          |                     |
|                                   | Switzerland     | Russia              | Serbia              | Romania             | Thailand            |                     |
|                                   | Ukraine         | Serbia              | Singapore           | Russia              | Trinidad and Tobago |                     |
|                                   | United Kingdom  | Singapore           | Slovak Republic     | Slovak Republic     | Turkey              |                     |
|                                   | United States   | Slovak Republic     | Slovenia            | South Africa        | Ukraine             |                     |
|                                   | Uruguay         | Slovenia            | Sri Lanka           | Sri Lanka           | Uzbekistan          |                     |
|                                   |                 | Spain               | Suriname            | Suriname            | Vietnam             |                     |
|                                   |                 | Sri Lanka           | Thailand            | Tajikistan          |                     |                     |
|                                   |                 | Suriname            | Thailand and Tobago | Thailand            |                     |                     |
|                                   |                 | Thailand            | Tunisia             | Trinidad and Tobago |                     |                     |
|                                   |                 | Trinidad and Tobago | Ukraine             | Tunisia             |                     |                     |
|                                   |                 | Ukraine             | Uruguay             | Turkey              |                     |                     |
|                                   |                 | United States       | Uzbekistan          | Ukraine             |                     |                     |
|                                   |                 | Uruguay             | Vietnam             | Uzbekistan          |                     |                     |
|                                   |                 |                     |                     | Vietnam             |                     |                     |
|                                   |                 |                     |                     | Zimbabwe            |                     |                     |
| <b>Highest Stratum (LEB ≥ 71)</b> | Denmark         | Australia           | Australia           | Argentina           | Algeria             | Algeria             |
|                                   | Iceland         | Belarus             | Austria             | Australia           | Argentina           | Argentina           |
|                                   | Netherlands     | Canada              | Belarus             | Austria             | Australia           | Armenia             |
|                                   | Norway          | Denmark             | Belgium             | Barbados            | Austria             | Australia           |
|                                   | Sweden          | Estonia             | Bulgaria            | Belarus             | Barbados            | Austria             |
|                                   |                 | France              | Canada              | Belgium             | Belgium             | Bahamas             |
|                                   |                 | Greece              | Costa Rica          | Belize              | Belize              | Barbados            |
|                                   |                 | Iceland             | Cuba                | Bulgaria            | Canada              | Belgium             |
|                                   |                 | Latvia              | Denmark             | Canada              | Chile               | Brazil              |
|                                   |                 | Lithuania           | Finland             | Chile               | Colombia            | Bulgaria            |
|                                   |                 | Netherlands         | France              | Costa Rica          | Costa Rica          | Canada              |
|                                   |                 | New Zealand         | Germany             | Croatia             | Croatia             | Chile               |
|                                   |                 | Norway              | Greece              | Cuba                | Cuba                | Colombia            |
|                                   |                 | Sweden              | Iceland             | Denmark             | Denmark             | Costa Rica          |
|                                   |                 | Switzerland         | Ireland             | Finland             | Ecuador             | Croatia             |
|                                   |                 | United Kingdom      | Israel              | France              | El Salvador         | Cuba                |
|                                   |                 |                     | Italy               | Germany             | Finland             | Denmark             |
|                                   |                 |                     | Japan               | Greece              | France              | Ecuador             |
|                                   |                 |                     | Lithuania           | Iceland             | Georgia             | El Salvador         |
|                                   |                 |                     | Luxembourg          | Ireland             | Germany             | Estonia             |
|                                   |                 |                     | Malta               | Israel              | Greece              | Finland             |
|                                   |                 |                     | Netherlands         | Italy               | Iceland             | France              |
|                                   |                 |                     | New Zealand         | Jamaica             | Ireland             | Georgia             |
|                                   |                 |                     | Norway              | Japan               | Israel              | Germany             |
|                                   |                 |                     | Panama              | Lithuania           | Italy               | Greece              |

| Year 1955 | Year 1965 | Year 1975      | Year 1985      | Year 1995       | Year 2005       |
|-----------|-----------|----------------|----------------|-----------------|-----------------|
|           |           | Spain          | Luxembourg     | Jamaica         | Hungary         |
|           |           | Sweden         | Malta          | Japan           | Iceland         |
|           |           | Switzerland    | Netherlands    | Lebanon         | Iran            |
|           |           | United Kingdom | New Zealand    | Luxembourg      | Ireland         |
|           |           | United States  | Norway         | Malaysia        | Israel          |
|           |           |                | Panama         | Malta           | Italy           |
|           |           |                | Paraguay       | Mexico          | Jamaica         |
|           |           |                | Portugal       | Netherlands     | Japan           |
|           |           |                | Qatar          | New Zealand     | Lebanon         |
|           |           |                | Serbia         | Nicaragua       | Lithuania       |
|           |           |                | Singapore      | Norway          | Luxembourg      |
|           |           |                | Slovenia       | Oman            | Malaysia        |
|           |           |                | Spain          | Panama          | Maldives        |
|           |           |                | Sweden         | Paraguay        | Malta           |
|           |           |                | Switzerland    | Peru            | Mauritius       |
|           |           |                | United Kingdom | Poland          | Mexico          |
|           |           |                | United States  | Portugal        | Morocco         |
|           |           |                | Uruguay        | Qatar           | Netherlands     |
|           |           |                |                | Serbia          | New Zealand     |
|           |           |                |                | Singapore       | Nicaragua       |
|           |           |                |                | Slovak Republic | Norway          |
|           |           |                |                | Slovenia        | Oman            |
|           |           |                |                | Spain           | Panama          |
|           |           |                |                | Sri Lanka       | Paraguay        |
|           |           |                |                | Sweden          | Peru            |
|           |           |                |                | Switzerland     | Poland          |
|           |           |                |                | Tunisia         | Portugal        |
|           |           |                |                | United Kingdom  | Qatar           |
|           |           |                |                | United States   | Romania         |
|           |           |                |                | Uruguay         | Serbia          |
|           |           |                |                |                 | Singapore       |
|           |           |                |                |                 | Slovak Republic |
|           |           |                |                |                 | Slovenia        |
|           |           |                |                |                 | Spain           |
|           |           |                |                |                 | Sri Lanka       |
|           |           |                |                |                 | Sweden          |
|           |           |                |                |                 | Switzerland     |
|           |           |                |                |                 | Thailand        |
|           |           |                |                |                 | Tunisia         |
|           |           |                |                |                 | Turkey          |
|           |           |                |                |                 | United Kingdom  |
|           |           |                |                |                 | United States   |
|           |           |                |                |                 | Uruguay         |
|           |           |                |                |                 | Vietnam         |

*Table A-2-4: Summary statistics, Lowest Stratum (LEB < 51)*

| Variables                              | Decade<br>1950-59 |      | Decade<br>1960-69 |      | Decade<br>1970-79 |      | Decade<br>1980-89 |      | Decade<br>1990-99 |      | Decade<br>2000-09 |      |
|----------------------------------------|-------------------|------|-------------------|------|-------------------|------|-------------------|------|-------------------|------|-------------------|------|
|                                        | Mean<br>(SD)      | Obs. | Mean<br>(SD)      | Obs. | Mean<br>(SD)      | Obs. | Mean<br>(SD)      | Obs. | Mean<br>(SD)      | Obs. | Mean<br>(SD)      | Obs. |
| Life Expectancy at Birth               | 42.76<br>(4.09)   | 635  | 45.95<br>(3.32)   | 435  | 47.43<br>(2.62)   | 197  | 49.02<br>(1.83)   | 106  | 47.85<br>(4.83)   | 82   | 47.70<br>(2.12)   | 60   |
| LEB decade gain                        | 7.38<br>(3.59)    | 635  | 5.26<br>(1.96)    | 435  | 3.92<br>(2.54)    | 197  | 2.73<br>(2.40)    | 106  | -2.56<br>(6.02)   | 82   | -6.82<br>(6.64)   | 60   |
| GDP per capita, 2005, PPP \$           | 1841<br>(1079)    | 172  | 1275<br>(1164)    | 348  | 950<br>(523)      | 187  | 814<br>(437)      | 98   | 850<br>(588)      | 82   | 1575<br>(1953)    | 60   |
| Population density per km <sup>2</sup> | 33.35<br>(56.99)  | 635  | 46.71<br>(78.16)  | 435  | 55.56<br>(73.45)  | 197  | 59.58<br>(74.75)  | 106  | 82.98<br>(90.03)  | 82   | 70.03<br>(63.38)  | 60   |
| CO2 in tons per capita                 | 0.28<br>(0.65)    | 421  | 0.22<br>(0.32)    | 393  | 0.21<br>(0.27)    | 187  | 0.16<br>(0.15)    | 98   | 0.16<br>(0.20)    | 82   | 0.54<br>(0.61)    | 53   |
| Total Fertility Rate                   | 6.51<br>(0.65)    | 635  | 6.62<br>(0.63)    | 435  | 6.76<br>(0.73)    | 197  | 7.17<br>(0.54)    | 106  | 6.73<br>(0.65)    | 82   | 4.85<br>(1.25)    | 60   |
| HIV Prevalence                         | 0.00<br>(0.00)    | 635  | 0.00<br>(0.00)    | 435  | 0.45<br>(0.85)    | 197  | 1.88<br>(2.39)    | 106  | 6.04<br>(5.34)    | 82   | 17.03<br>(7.83)   | 60   |

*Table A-2-5: Summary statistics, Stratum II ( $51 \leq LEB < 61$ )*

| Variables                              | Decade<br>1950-59 |      | Decade<br>1960-69 |      | Decade<br>1970-79 |      | Decade<br>1980-89 |      | Decade<br>1990-99 |      | Decade<br>2000-09 |      |
|----------------------------------------|-------------------|------|-------------------|------|-------------------|------|-------------------|------|-------------------|------|-------------------|------|
|                                        | Mean<br>(SD)      | Obs. | Mean<br>(SD)      | Obs. | Mean<br>(SD)      | Obs. | Mean<br>(SD)      | Obs. | Mean<br>(SD)      | Obs. | Mean<br>(SD)      | Obs. |
| Life Expectancy at Birth               | 56.83<br>(2.83)   | 320  | 55.73<br>(3.00)   | 316  | 55.91<br>(2.94)   | 414  | 56.33<br>(2.79)   | 360  | 56.28<br>(3.08)   | 333  | 56.30<br>(2.67)   | 297  |
| LEB decade gain                        | 12.76<br>(7.76)   | 320  | 5.97<br>(1.73)    | 316  | 5.27<br>(2.27)    | 414  | 3.15<br>(2.55)    | 360  | 0.72<br>(3.41)    | 333  | 1.89<br>(5.10)    | 297  |
| GDP per capita, 2005, PPP \$           | 2353<br>(1393)    | 127  | 2316<br>(1595)    | 228  | 2410<br>(2591)    | 406  | 1703<br>(1936)    | 358  | 1615<br>(2090)    | 331  | 2276<br>(3039)    | 297  |
| Population density per km <sup>2</sup> | 69.36<br>(190.49) | 320  | 33.91<br>(56.38)  | 316  | 50.26<br>(97.47)  | 414  | 68.44<br>(122.50) | 360  | 67.78<br>(106.84) | 333  | 60.98<br>(80.17)  | 297  |
| CO2 in tons per capita                 | 1.50<br>(2.58)    | 206  | 0.91<br>(1.30)    | 237  | 1.09<br>(1.90)    | 384  | 0.66<br>(1.35)    | 346  | 0.51<br>(0.92)    | 318  | 0.86<br>(2.01)    | 297  |
| Total Fertility Rate                   | 5.53<br>(1.35)    | 320  | 6.50<br>(0.84)    | 316  | 6.58<br>(0.71)    | 414  | 6.28<br>(0.70)    | 360  | 5.66<br>(1.01)    | 333  | 5.46<br>(1.14)    | 297  |
| HIV Prevalence                         | 0.00<br>(0.00)    | 320  | 0.00<br>(0.00)    | 316  | 0.49<br>(1.14)    | 414  | 1.45<br>(2.23)    | 360  | 3.46<br>(5.38)    | 333  | 4.59<br>(5.00)    | 297  |

*Table A-2-6: Summary statistics, Stratum III (61 ≤ LEB < 71)*

| Variables                              | Decade<br>1950-59  |      | Decade<br>1960-69  |      | Decade<br>1970-79  |      | Decade<br>1980-89 |      | Decade<br>1990-99  |      | Decade<br>2000-09  |      |
|----------------------------------------|--------------------|------|--------------------|------|--------------------|------|-------------------|------|--------------------|------|--------------------|------|
|                                        | Mean<br>(SD)       | Obs. | Mean<br>(SD)       | Obs. | Mean<br>(SD)       | Obs. | Mean<br>(SD)      | Obs. | Mean<br>(SD)       | Obs. | Mean<br>(SD)       | Obs. |
| Life Expectancy at Birth               | 66.11<br>(2.75)    | 384  | 66.84<br>(3.13)    | 494  | 66.71<br>(2.87)    | 488  | 66.93<br>(2.85)   | 492  | 66.97<br>(2.98)    | 425  | 66.42<br>(3.12)    | 340  |
| LEB decade gain                        | 11.55<br>(9.55)    | 384  | 4.35<br>(2.14)     | 494  | 3.30<br>(2.93)     | 488  | 3.42<br>(2.76)    | 492  | 1.75<br>(2.89)     | 425  | 2.42<br>(2.81)     | 340  |
| GDP per capita, 2005, PPP \$           | 8123<br>(4131)     | 219  | 7548<br>(5420)     | 275  | 6750<br>(5598)     | 338  | 5531<br>(4800)    | 368  | 4922<br>(4572)     | 396  | 4363<br>(4530)     | 340  |
| Population density per km <sup>2</sup> | 139.10<br>(295.44) | 384  | 161.22<br>(400.42) | 494  | 135.95<br>(416.39) | 488  | 81.76<br>(112.27) | 492  | 103.53<br>(164.34) | 425  | 114.69<br>(177.81) | 340  |
| CO2 in tons per capita                 | 4.97<br>(6.12)     | 313  | 6.21<br>(12.27)    | 396  | 6.14<br>(11.97)    | 363  | 3.49<br>(4.53)    | 376  | 3.57<br>(3.88)     | 399  | 2.72<br>(3.89)     | 340  |
| Total Fertility Rate                   | 3.22<br>(1.20)     | 384  | 3.82<br>(1.62)     | 494  | 3.89<br>(1.57)     | 488  | 3.99<br>(1.54)    | 492  | 3.22<br>(1.37)     | 425  | 3.17<br>(1.26)     | 340  |
| HIV Prevalence                         | 0.00<br>(0.00)     | 384  | 0.00<br>(0.00)     | 494  | 0.13<br>(0.38)     | 488  | 0.86<br>(2.45)    | 492  | 0.82<br>(2.09)     | 425  | 0.78<br>(2.00)     | 338  |

*Table A-2-7: Summary statistics, Highest Stratum (LEB ≥ 71)*

| Variables                              | Decade<br>1950-59 |      | Decade<br>1960-69 |      | Decade<br>1970-79  |      | Decade<br>1980-89  |      | Decade<br>1990-99  |      | Decade<br>2000-09  |      |
|----------------------------------------|-------------------|------|-------------------|------|--------------------|------|--------------------|------|--------------------|------|--------------------|------|
|                                        | Mean<br>(SD)      | Obs. | Mean<br>(SD)      | Obs. | Mean<br>(SD)       | Obs. | Mean<br>(SD)       | Obs. | Mean<br>(SD)       | Obs. | Mean<br>(SD)       | Obs. |
| Life Expectancy at Birth               | 72.31<br>(0.81)   | 51   | 72.25<br>(0.96)   | 145  | 72.92<br>(1.39)    | 291  | 74.19<br>(1.93)    | 432  | 75.23<br>(2.51)    | 550  | 76.44<br>(3.08)    | 693  |
| LEB decade gain                        | 4.80<br>(2.69)    | 51   | 2.43<br>(1.85)    | 145  | 2.08<br>(1.51)     | 291  | 2.52<br>(1.11)     | 432  | 2.32<br>(1.70)     | 550  | 2.39<br>(1.16)     | 693  |
| GDP per capita, 2005, PPP \$           | 11835<br>(2013)   | 51   | 15343<br>(3878)   | 117  | 16854<br>(6579)    | 269  | 17820<br>(9289)    | 383  | 17931<br>(12379)   | 549  | 20067<br>(16291)   | 693  |
| Population density per km <sup>2</sup> | 74.69<br>(98.10)  | 51   | 77.48<br>(88.75)  | 145  | 151.83<br>(327.03) | 291  | 220.99<br>(601.16) | 432  | 224.20<br>(684.10) | 550  | 241.23<br>(769.11) | 693  |
| CO2 in tons per capita                 | 4.99<br>(1.23)    | 51   | 7.19<br>(2.98)    | 122  | 9.89<br>(8.52)     | 273  | 8.44<br>(7.34)     | 390  | 7.50<br>(8.34)     | 543  | 7.01<br>(7.60)     | 693  |
| Total Fertility Rate                   | 2.95<br>(0.62)    | 51   | 2.77<br>(0.56)    | 145  | 2.39<br>(0.86)     | 291  | 2.23<br>(0.90)     | 432  | 2.23<br>(0.89)     | 550  | 1.93<br>(0.54)     | 693  |
| HIV Prevalence                         | 0.00<br>(0.00)    | 51   | 0.00<br>(0.00)    | 145  | 0.04<br>(0.07)     | 291  | 0.14<br>(0.28)     | 432  | 0.24<br>(0.38)     | 550  | 0.33<br>(0.44)     | 690  |

**Table A-2-8: F-tests of equality between decadal dummies parameters, 1960-69 against 2000-09 and 1980-89 against 2000-09**

|                             | <b>All data<br/>(1950-2009) <sup>(1)</sup></b> |                                |                          | <b>IHME data<br/>(1970-2009) <sup>(2)</sup></b> |                                |                          |
|-----------------------------|------------------------------------------------|--------------------------------|--------------------------|-------------------------------------------------|--------------------------------|--------------------------|
|                             | Parameter<br>Decade<br>1960-69                 | Parameter<br>Decade<br>2000-09 | F-statistic<br>(p-value) | Parameter<br>Decade<br>1980-89                  | Parameter<br>Decade<br>2000-09 | F-statistic<br>(p-value) |
| Lowest Stratum (LEB < 51)   | -4.1708                                        | -8.4908                        | 30.6527<br>(0.0000)      | -1.8770                                         | -3.2594                        | 2.9265<br>(0.0880)       |
| Stratum II (51 ≤ LEB < 61)  | -4.7990                                        | -11.4248                       | 188.2726<br>(0.0000)     | -2.5990                                         | -2.8321                        | 0.5248<br>(0.4689)       |
| Stratum III (61 ≤ LEB < 71) | -4.4669                                        | -7.2831                        | 35.2863<br>(0.0000)      | -0.7280                                         | -1.4739                        | 9.3644<br>(0.0023)       |
| Highest Stratum (LEB ≥ 71)  | -2.9610                                        | -1.8926                        | 23.1736<br>(0.0000)      | 0.2793                                          | -0.0444                        | 7.0894<br>(0.0078)       |

Note:

(1) The F-tests comparing the coefficient on 1960-1969 to 2000-2009 (with 1950-59 as reference stratum)

(2) The F-tests comparing the coefficient on 1980-1989 to 2000-2009 (with 1970-79 as reference stratum)



*Table A-2-9: The effects of LEB, income per capita, fertility, population density, CO2 emissions, and time on LEB decadal gains, 1950 – 2009, Fixed effects model*

|                                        | LEB decadal gains         |                            |                             |                            | Total                 |
|----------------------------------------|---------------------------|----------------------------|-----------------------------|----------------------------|-----------------------|
|                                        | Lowest Stratum (LEB < 51) | Stratum II (51 ≤ LEB < 61) | Stratum III (61 ≤ LEB < 71) | Highest Stratum (LEB ≥ 71) |                       |
| Life Expectancy at Birth               | 2.279***<br>(0.118)       | 1.618***<br>(0.0819)       | 0.594***<br>(0.0777)        | 0.716***<br>(0.0552)       | 3.604***<br>(0.0718)  |
| GDP per capita, 2005, PPP \$           | 0.248***<br>(0.0832)      | 0.158**<br>(0.0623)        | 0.0652<br>(0.0654)          | -0.0579<br>(0.0419)        | -0.108***<br>(0.0382) |
| Population density per km <sup>2</sup> | -1.329***<br>(0.142)      | -1.319***<br>(0.140)       | -0.937***<br>(0.0811)       | -0.490***<br>(0.0409)      | -1.529***<br>(0.0903) |
| CO2 in tons per capita                 | -0.258***<br>(0.0913)     | -0.0880<br>(0.0622)        | -0.145**<br>(0.0569)        | -0.201***<br>(0.0251)      | -0.145***<br>(0.0367) |
| Total Fertility Rate                   | 0.0966<br>(0.0834)        | -0.214***<br>(0.0818)      | 0.219***<br>(0.0729)        | 0.262***<br>(0.0313)       | -0.000115<br>(0.0495) |
| Decade 1960-69                         | -3.181***<br>(0.322)      | -4.345***<br>(0.403)       | -5.212***<br>(0.248)        | -2.968***<br>(0.181)       | -5.545***<br>(0.138)  |
| Decade 1970-79                         | -5.003***<br>(0.429)      | -6.739***<br>(0.487)       | -5.597***<br>(0.327)        | -2.098***<br>(0.179)       | -7.545***<br>(0.174)  |
| Decade 1980-89                         | -6.738***<br>(0.515)      | -9.671***<br>(0.537)       | -6.686***<br>(0.384)        | -1.899***<br>(0.184)       | -9.589***<br>(0.215)  |
| Decade 1990-99                         | -8.862***<br>(0.582)      | -11.26***<br>(0.589)       | -7.440***<br>(0.430)        | -2.599***<br>(0.200)       | -11.01***<br>(0.258)  |
| Decade 2000-09                         | -5.328***<br>(0.805)      | -10.01***<br>(0.665)       | -6.971***<br>(0.493)        | -2.721***<br>(0.232)       | -10.84***<br>(0.306)  |
| Constant                               | 7.876***<br>(0.327)       | 12.01***<br>(0.487)        | 9.509***<br>(0.330)         | 4.842***<br>(0.193)        | 11.36***<br>(0.179)   |
| Observations                           | 1,019                     | 1,819                      | 2,425                       | 2,527                      | 7,827                 |
| R-squared                              | 0.470                     | 0.474                      | 0.388                       | 0.305                      | 0.471                 |
| Number of countries                    | 62                        | 91                         | 128                         | 94                         | 173                   |
| Country FE                             | Yes                       | Yes                        | Yes                         | Yes                        | Yes                   |

Standard errors in parentheses

\*\*\* P<0.01, \*\* P<0.05, \* P<0.1

Table A-2-10: LEB decade gains, by region, decade and LEB strata

| Decade                         | Lowest Stratum<br>(LEB < 51) |              | Stratum II<br>51 ≤ LEB < 61 |              | Stratum III<br>61 ≤ LEB < 71 |              | Highest Stratum<br>(LEB ≥ 71) |             |
|--------------------------------|------------------------------|--------------|-----------------------------|--------------|------------------------------|--------------|-------------------------------|-------------|
|                                | Mean<br>(SD)<br>(N)          | IQR          | Mean<br>(SD)<br>(N)         | IQR          | Mean<br>(SD)<br>(N)          | IQR          | Mean<br>(SD)<br>(N)           | IQR         |
| <b>East Asia and Pacific</b>   |                              |              |                             |              |                              |              |                               |             |
| 1950-1959                      | 9.06<br>(3.64)<br>(42)       | 6.93 - 11.76 | 13.88<br>(6.61)<br>(53)     | 9.13 - 17.72 | 9.22<br>(9.06)<br>(33)       | 2.80 - 13.78 | 2.24<br>(0.24)<br>(2)         | 2.06 - 2.41 |
| 1960-1969                      | 5.48<br>(2.72)<br>(26)       | 2.60 - 7.63  | 6.59<br>(1.85)<br>(36)      | 5.51 - 8.08  | 4.90<br>(1.68)<br>(47)       | 3.82 - 5.88  | 2.01<br>(1.69)<br>(21)        | 0.83 - 2.00 |
| 1970-1979                      | 0.93<br>(1.43)<br>(8)        | 1.15 - 1.64  | 5.45<br>(3.56)<br>(36)      | 4.56 - 7.39  | 3.61<br>(1.63)<br>(54)       | 2.43 - 5.01  | 2.07<br>(1.54)<br>(32)        | 0.64 - 3.61 |
| 1980-1989                      | .<br>(.)<br>(0)              | ..           | 3.33<br>(3.97)<br>(26)      | -0.80 - 6.90 | 3.29<br>(2.42)<br>(57)       | 1.70 - 3.80  | 3.01<br>(0.67)<br>(47)        | 2.60 - 3.50 |
| 1990-1999                      | .<br>(.)<br>(0)              | ..           | 1.40<br>(1.89)<br>(23)      | -0.10 - 3.40 | 1.80<br>(1.65)<br>(47)       | -0.20 - 3.40 | 2.78<br>(0.81)<br>(60)        | 2.40 - 3.30 |
| 2000-2009                      | .<br>(.)<br>(0)              | ..           | 1.30<br>(0.34)<br>(11)      | 1.00 - 1.60  | 1.81<br>(1.70)<br>(49)       | 0.40 - 2.30  | 2.47<br>(0.96)<br>(70)        | 2.00 - 3.10 |
| <b>Europe and Central Asia</b> |                              |              |                             |              |                              |              |                               |             |
| 1950-1959                      | 10.58<br>(6.40)<br>(13)      | 6.79 - 10.20 | 18.11<br>(10.20)<br>(96)    | 8.27 - 26.02 | 13.42<br>(10.47)<br>(242)    | 6.19 - 17.24 | 4.91<br>(2.69)<br>(49)        | 3.14 - 6.20 |
| 1960-1969                      | 6.63<br>(0.50)<br>(4)        | 6.25 - 7.01  | 4.23<br>(1.45)<br>(44)      | 3.34 - 4.33  | 4.07<br>(2.24)<br>(240)      | 2.49 - 5.08  | 2.46<br>(1.88)<br>(112)       | 1.04 - 3.56 |
| 1970-1979                      | .<br>(.)<br>(0)              | ..           | 5.53<br>(1.80)<br>(16)      | 3.83 - 7.26  | 1.96<br>(2.03)<br>(196)      | 0.06 - 3.70  | 1.56<br>(1.06)<br>(188)       | 0.99 - 2.27 |
| 1980-1989                      | .<br>(.)<br>(0)              | ..           | .<br>(0.34)<br>(11)         | ..           | 1.75<br>(1.70)<br>(49)       | -0.20 - 3.20 | 2.09<br>(0.96)<br>(70)        | 1.60 - 2.70 |

| Decade                                 | Lowest Stratum<br>(LEB < 51) |              | Stratum II<br>51 ≤ LEB < 61 |               | Stratum III<br>61 ≤ LEB < 71 |              | Highest Stratum<br>(LEB ≥ 71) |             |
|----------------------------------------|------------------------------|--------------|-----------------------------|---------------|------------------------------|--------------|-------------------------------|-------------|
|                                        | Mean<br>(SD)<br>(N)          | IQR          | Mean<br>(SD)<br>(N)         | IQR           | Mean<br>(SD)<br>(N)          | IQR          | Mean<br>(SD)<br>(N)           | IQR         |
| 1990-1999                              | (.)                          |              | (.)                         |               | (2.05)                       |              | (0.91)                        |             |
|                                        | (0)                          |              | (0)                         |               | (159)                        |              | (241)                         |             |
|                                        | .                            | . - .        | -4.90                       | -4.90 - -4.90 | -0.38                        | -1.60 - 0.60 | 1.82                          | 1.40 - 2.40 |
| 2000-2009                              | (.)                          |              | (.)                         |               | (2.00)                       |              | (0.75)                        |             |
|                                        | (0)                          |              | (1)                         |               | (154)                        |              | (245)                         |             |
|                                        | .                            | . - .        | .                           | . - .         | 1.40                         | 0.00 - 3.00  | 2.43                          | 2.00 - 2.80 |
|                                        | (.)                          |              | (.)                         |               | (2.31)                       |              | (0.84)                        |             |
|                                        | (0)                          |              | (0)                         |               | (90)                         |              | (310)                         |             |
| <b>Latin America and the Caribbean</b> |                              |              |                             |               |                              |              |                               |             |
| 1950-1959                              | 6.80                         | 5.34 - 7.69  | 8.54                        | 6.70 - 10.53  | 7.24                         | 5.13 - 9.72  | .                             | . - .       |
|                                        | (1.83)                       |              | (2.40)                      |               | (3.43)                       |              | (.)                           |             |
|                                        | (71)                         |              | (121)                       |               | (58)                         |              | (0)                           |             |
| 1960-1969                              | 5.09                         | 4.07 - 5.82  | 6.39                        | 5.11 - 7.49   | 4.63                         | 2.56 - 6.05  | 6.62                          | 6.60 - 6.65 |
|                                        | (0.88)                       |              | (1.81)                      |               | (1.91)                       |              | (0.03)                        |             |
|                                        | (42)                         |              | (63)                        |               | (143)                        |              | (2)                           |             |
| 1970-1979                              | 4.20                         | 3.90 - 4.64  | 6.58                        | 5.51 - 7.76   | 4.30                         | 2.30 - 5.21  | 5.07                          | 3.77 - 5.78 |
|                                        | (0.48)                       |              | (1.95)                      |               | (3.19)                       |              | (1.22)                        |             |
|                                        | (11)                         |              | (33)                        |               | (176)                        |              | (30)                          |             |
| 1980-1989                              | 3.60                         | 3.60 - 3.60  | 4.92                        | 4.30 - 6.10   | 3.91                         | 2.30 - 4.70  | 3.00                          | 2.55 - 3.85 |
|                                        | (.)                          |              | (1.86)                      |               | (2.22)                       |              | (1.29)                        |             |
|                                        | (1)                          |              | (21)                        |               | (140)                        |              | (88)                          |             |
| 1990-1999                              | .                            | . - .        | 2.86                        | 2.50 - 3.20   | 2.32                         | 0.90 - 3.80  | 2.07                          | 0.80 - 3.10 |
|                                        | (.)                          |              | (0.57)                      |               | (2.43)                       |              | (1.69)                        |             |
|                                        | (0)                          |              | (10)                        |               | (94)                         |              | (146)                         |             |
| 2000-2009                              | .                            | . - .        | 4.40                        | 3.90 - 4.70   | 1.32                         | -0.70 - 3.70 | 2.03                          | 1.60 - 2.70 |
|                                        | (.)                          |              | (0.36)                      |               | (2.58)                       |              | (1.20)                        |             |
|                                        | (0)                          |              | (7)                         |               | (70)                         |              | (173)                         |             |
| <b>Middle East and North Africa</b>    |                              |              |                             |               |                              |              |                               |             |
| 1950-1959                              | 9.74                         | 7.07 - 12.62 | 14.17                       | 9.07 - 19.04  | 12.49                        | 6.33 - 18.10 | .                             | . - .       |
|                                        | (3.43)                       |              | (6.00)                      |               | (7.85)                       |              | (.)                           |             |
|                                        | (67)                         |              | (12)                        |               | (31)                         |              | (0)                           |             |

| Decade               | Lowest Stratum<br>(LEB < 51) |                 | Stratum II<br>51 ≤ LEB < 61 |               | Stratum III<br>61 ≤ LEB < 71 |             | Highest Stratum<br>(LEB ≥ 71) |             |
|----------------------|------------------------------|-----------------|-----------------------------|---------------|------------------------------|-------------|-------------------------------|-------------|
|                      | Mean<br>(SD)<br>(N)          | IQR             | Mean<br>(SD)<br>(N)         | IQR           | Mean<br>(SD)<br>(N)          | IQR         | Mean<br>(SD)<br>(N)           | IQR         |
| 1960-1969            | 7.41<br>(1.56)<br>(25)       | 6.36 - 9.09     | 6.16<br>(1.31)<br>(45)      | 5.13 - 6.45   | 4.48<br>(2.08)<br>(40)       | 2.95 - 6.08 | .                             | . - .       |
| 1970-1979            | -19.81<br>(.)<br>(1)         | -19.81 - -19.81 | 6.28<br>(2.25)<br>(58)      | 4.56 - 8.28   | 5.14<br>(5.16)<br>(29)       | 3.06 - 9.66 | 2.51<br>(0.60)<br>(22)        | 2.18 - 2.68 |
| 1980-1989            | .                            | . - .           | 2.09<br>(4.61)<br>(20)      | 0.05 - 6.30   | 6.24<br>(4.17)<br>(58)       | 5.20 - 8.80 | 3.52<br>(1.15)<br>(32)        | 2.75 - 4.35 |
| 1990-1999            | .                            | . - .           | -0.73<br>(0.24)<br>(10)     | -0.90 - -0.50 | 5.71<br>(1.60)<br>(33)       | 4.80 - 6.30 | 4.46<br>(2.86)<br>(67)        | 2.60 - 5.00 |
| 2000-2009            | .                            | . - .           | -0.06<br>(0.57)<br>(8)      | -0.45 - 0.30  | 2.61<br>(0.94)<br>(12)       | 1.80 - 3.30 | 2.72<br>(1.28)<br>(90)        | 2.10 - 2.90 |
| <b>North America</b> |                              |                 |                             |               |                              |             |                               |             |
| 1950-1959            | .                            | . - .           | .                           | . - .         | 3.76<br>(0.78)<br>(20)       | 3.22 - 4.41 | .                             | . - .       |
| 1960-1969            | .                            | . - .           | .                           | . - .         | 1.13<br>(0.54)<br>(10)       | 0.68 - 1.73 | 2.11<br>(0.43)<br>(10)        | 1.73 - 2.54 |
| 1970-1979            | .                            | . - .           | .                           | . - .         | 0.97<br>(.)<br>(1)           | 0.97 - 0.97 | 2.05<br>(0.62)<br>(19)        | 1.64 - 2.39 |
| 1980-1989            | .                            | . - .           | .                           | . - .         | .                            | . - .       | 2.57<br>(0.52)<br>(20)        | 2.30 - 3.00 |
| 1990-1999            | .                            | . - .           | .                           | . - .         | .                            | . - .       | 1.67<br>(0.36)<br>(20)        | 1.45 - 1.90 |

| Decade                    | Lowest Stratum<br>(LEB < 51) |             | Stratum II<br>51 ≤ LEB < 61 |              | Stratum III<br>61 ≤ LEB < 71 |             | Highest Stratum<br>(LEB ≥ 71) |             |
|---------------------------|------------------------------|-------------|-----------------------------|--------------|------------------------------|-------------|-------------------------------|-------------|
|                           | Mean<br>(SD)<br>(N)          | IQR         | Mean<br>(SD)<br>(N)         | IQR          | Mean<br>(SD)<br>(N)          | IQR         | Mean<br>(SD)<br>(N)           | IQR         |
| 2000-2009                 | .                            | ...         | .                           | ...          | .                            | ...         | 1.75<br>(0.33)<br>(20)        | 1.50 - 1.95 |
| <b>South Asia</b>         |                              |             |                             |              |                              |             |                               |             |
| 1950-1959                 | 5.62<br>(4.83)<br>(60)       | 3.26 - 6.17 | 8.95<br>(3.29)<br>(10)      | 6.28 - 11.90 | .                            | ...         | .                             | ...         |
| 1960-1969                 | 6.32<br>(1.97)<br>(54)       | 5.21 - 7.26 | 8.33<br>(1.09)<br>(8)       | 7.37 - 9.24  | 5.34<br>(0.52)<br>(8)        | 4.97 - 5.64 | .                             | ...         |
| 1970-1979                 | 5.35<br>(1.64)<br>(23)       | 4.47 - 6.58 | 6.21<br>(1.86)<br>(37)      | 4.87 - 7.11  | 3.33<br>(1.04)<br>(10)       | 2.42 - 4.06 | .                             | ...         |
| 1980-1989                 | .                            | ...         | 5.01<br>(1.06)<br>(48)      | 4.35 - 5.40  | 5.10<br>(0.51)<br>(18)       | 4.80 - 5.60 | 3.77<br>(1.18)<br>(4)         | 2.85 - 4.70 |
| 1990-1999                 | .                            | ...         | 4.71<br>(1.38)<br>(21)      | 3.40 - 6.30  | 5.18<br>(2.31)<br>(37)       | 3.70 - 6.70 | 2.59<br>(2.20)<br>(12)        | 1.15 - 2.90 |
| 2000-2009                 | .                            | ...         | .                           | ...          | 4.13<br>(1.94)<br>(50)       | 3.50 - 5.40 | 4.20<br>(2.75)<br>(20)        | 1.65 - 6.75 |
| <b>Sub-Saharan Africa</b> |                              |             |                             |              |                              |             |                               |             |
| 1950-1959                 | 7.06<br>(3.19)<br>(382)      | 4.73 - 8.83 | 11.34<br>(5.05)<br>(28)     | 7.18 - 15.29 | .                            | ...         | .                             | ...         |
| 1960-1969                 | 4.86<br>(1.84)<br>(284)      | 3.59 - 6.02 | 5.97<br>(1.43)<br>(120)     | 4.94 - 7.04  | 7.78<br>(1.81)<br>(6)        | 6.32 - 9.29 | .                             | ...         |
| 1970-1979                 | 4.00<br>(1.82)               | 2.25 - 5.47 | 4.64<br>(1.91)              | 3.40 - 5.67  | 4.10<br>(1.48)               | 2.54 - 5.55 | .                             | ...         |

| Decade    | Lowest Stratum<br>(LEB < 51) |                | Stratum II<br>51 ≤ LEB < 61 |              | Stratum III<br>61 ≤ LEB < 71 |             | Highest Stratum<br>(LEB ≥ 71) |             |
|-----------|------------------------------|----------------|-----------------------------|--------------|------------------------------|-------------|-------------------------------|-------------|
|           | Mean<br>(SD)<br>(N)          | IQR            | Mean<br>(SD)<br>(N)         | IQR          | Mean<br>(SD)<br>(N)          | IQR         | Mean<br>(SD)<br>(N)           | IQR         |
| 1980-1989 | (154)                        |                | (234)                       |              | (22)                         |             | (0)                           |             |
|           | 2.72                         | 1.40 - 4.60    | 2.70                        | 2.00 - 3.90  | 3.59                         | 2.80 - 4.20 | .                             | . - .       |
|           | (2.41)                       |                | (2.14)                      |              | (1.16)                       |             | (.)                           |             |
| 1990-1999 | (105)                        |                | (245)                       |              | (60)                         |             | (0)                           |             |
|           | -2.56                        | -3.90 - 1.40   | 0.34                        | -1.50 - 2.75 | 2.03                         | 1.35 - 2.90 | .                             | . - .       |
|           | (6.02)                       |                | (3.50)                      |              | (2.22)                       |             | (.)                           |             |
| 2000-2009 | (82)                         |                | (268)                       |              | (60)                         |             | (0)                           |             |
|           | -6.82                        | -12.95 - -1.05 | 1.91                        | -0.30 - 4.40 | 4.02                         | 2.70 - 4.30 | 1.69                          | 1.50 - 1.90 |
|           | (6.64)                       |                | (5.32)                      |              | (3.61)                       |             | (0.22)                        |             |
|           | (60)                         |                | (271)                       |              | (69)                         |             | (10)                          |             |

3. **Figures**

Figure A-3-1: LEB decadal gains by decade, Stratum II ( $51 \leq \text{LEB} < 61$ ) and Stratum III ( $61 \leq \text{LEB} < 71$ )

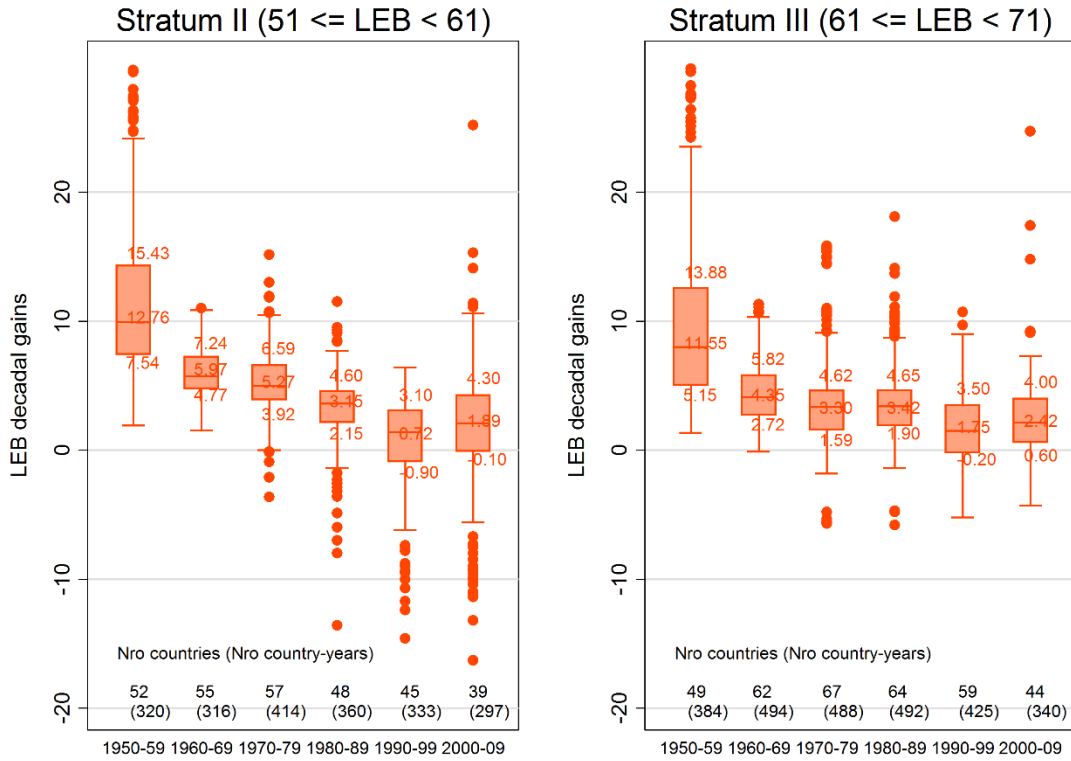

Figure A-3-2: LEB decadal gains distribution by strata, comparison between decades

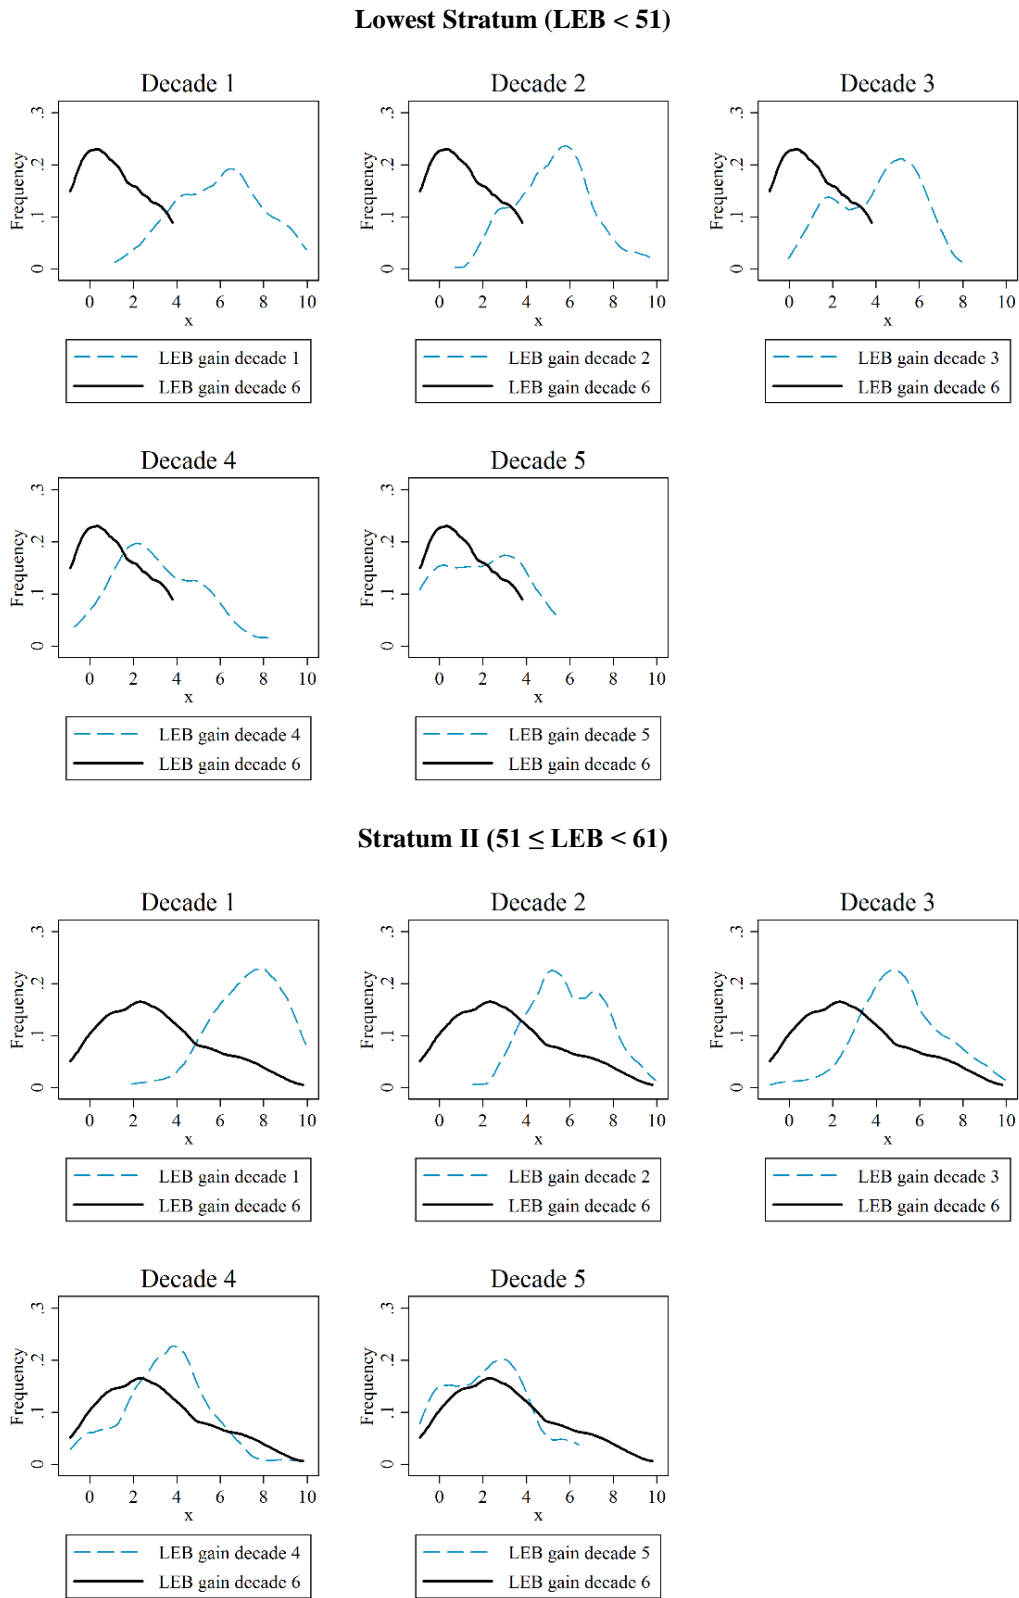



**Stratum III ( $61 \leq \text{LEB} < 71$ )**

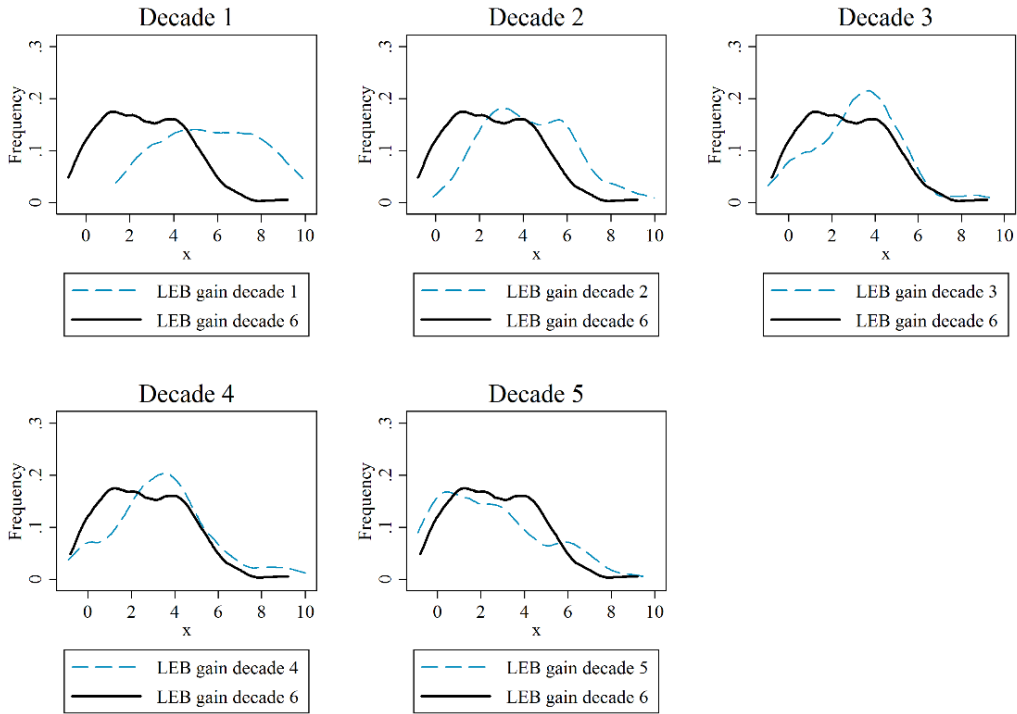

**Highest Stratum ( $\text{LEB} \geq 71$ )**

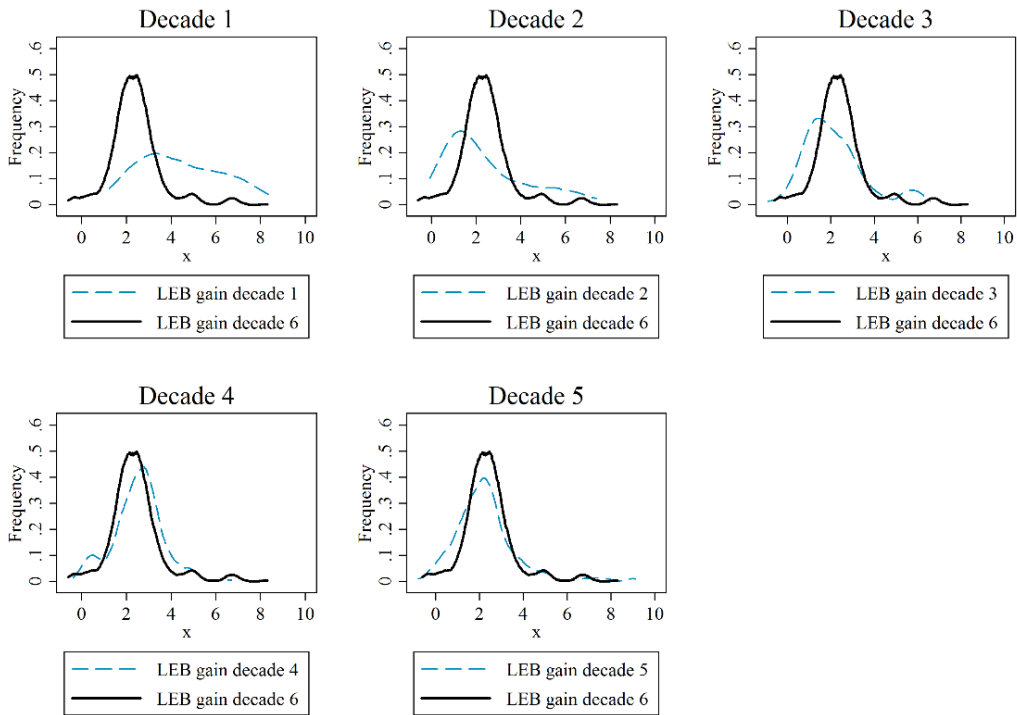

#### 4. HIV imputation

The global HIV/AIDS pandemic had a high impact on the overall number of deaths worldwide. In low income countries an estimated 1–4 years of life expectancy are lost due to HIV/AIDS in those older than 5 years [14]. For years prior to 1970, it was assumed HIV prevalence was virtually zero, since the disease was acknowledged in 1981 [15]. For countries lacking complete HIV data for years 1970-1989, country-specific trends were used to back-cast HIV rates.

Back-cast imputations were performed using a Fixed Effects (FE) model for each country following a cubic function of time, where HIV prevalence was used as the dependent variable. HIV prevalence was imputed for 1970 – 1989, based on information from 1990 – 2009. In order to extrapolate these values, countries had to have at least 18 observations in the 20 year-period. The general equation for the fixed effects regressions was  $E[\text{HIV}]_{it} = \beta_0 + \alpha_1 \cdot \text{year} + \alpha_2 \cdot \text{year}^2 + \alpha_3 \cdot \text{year}^3 + \mu_i + \varepsilon_{it}$ . Table A-4-1 lists the countries that followed this imputation (130 countries, imputation A).

Some countries have maintained the same HIV prevalence between 1990 – 2009, making a FE regression not possible. For these countries, the assumption was they had the same constant HIV prevalence as in 1990 – 2009. Table A-4-1 lists the countries that followed this imputation (16 countries, imputation B).

**Table A-4-1: Countries with HIV imputed values, FE regression (imputation A) and constant prevalence (imputation B)**

| Imputation | Country              | ISO Code | Imputation | Country          | ISO Code |
|------------|----------------------|----------|------------|------------------|----------|
| A          | Angola               | AGO      | A          | Latvia           | LVA      |
| A          | Argentina            | ARG      | A          | Morocco          | MAR      |
| A          | Armenia              | ARM      | A          | Moldova          | MDA      |
| A          | Australia            | AUS      | A          | Madagascar       | MDG      |
| A          | Austria              | AUT      | A          | Mexico           | MEX      |
| A          | Azerbaijan           | AZE      | A          | Mali             | MLI      |
| A          | Burundi              | BDI      | A          | Malta            | MLT      |
| A          | Belgium              | BEL      | A          | Myanmar          | MMR      |
| A          | Benin                | BEN      | A          | Mozambique       | MOZ      |
| A          | Burkina Faso         | BFA      | A          | Mauritania       | MRT      |
| A          | Bulgaria             | BGR      | A          | Mauritius        | MUS      |
| A          | Bahamas              | BHS      | A          | Malawi           | MWI      |
| A          | Belarus              | BLR      | A          | Malaysia         | MYS      |
| A          | Belize               | BLZ      | A          | Namibia          | NAM      |
| A          | Bolivia              | BOL      | A          | Niger            | NER      |
| A          | Brazil               | BRA      | A          | Nigeria          | NGA      |
| A          | Barbados             | BRB      | A          | Nicaragua        | NIC      |
| A          | Bhutan               | BTN      | A          | Netherlands      | NLD      |
| A          | Botswana             | BWA      | A          | Norway           | NOR      |
| A          | Central African Rep. | CAF      | A          | Nepal            | NPL      |
| A          | Canada               | CAN      | A          | New Zealand      | NZL      |
| A          | Switzerland          | CHE      | A          | Oman             | OMN      |
| A          | Chile                | CHL      | A          | Pakistan         | PAK      |
| A          | Cote d'Ivoire        | CIV      | A          | Panama           | PAN      |
| A          | Cameroon             | CMR      | A          | Peru             | PER      |
| A          | Congo, Rep.          | COG      | A          | Papua New Guinea | PNG      |
| A          | Colombia             | COL      | A          | Poland           | POL      |
| A          | Comoros              | COM      | A          | Portugal         | PRT      |
| A          | Costa Rica           | CRI      | A          | Paraguay         | PRY      |
| A          | Cuba                 | CUB      | A          | Romania          | ROM      |
| A          | Djibouti             | DJI      | A          | Russia           | RUS      |
| A          | Denmark              | DNK      | A          | Rwanda           | RWA      |
| A          | Dominican Rep.       | DOM      | A          | Sudan            | SDN      |

| <b>Imputation</b> | <b>Country</b>    | <b>ISO Code</b> | <b>Imputation</b> | <b>Country</b>      | <b>ISO Code</b> |
|-------------------|-------------------|-----------------|-------------------|---------------------|-----------------|
| A                 | Algeria           | DZA             | A                 | Senegal             | SEN             |
| A                 | Ecuador           | ECU             | A                 | Singapore           | SGP             |
| A                 | Eritrea           | ERI             | A                 | Sierra Leone        | SLE             |
| A                 | Spain             | ESP             | A                 | El Salvador         | SLV             |
| A                 | Estonia           | EST             | A                 | Somalia             | SOM             |
| A                 | Finland           | FIN             | A                 | Serbia              | SRB             |
| A                 | Fiji              | FJI             | A                 | Suriname            | SUR             |
| A                 | France            | FRA             | A                 | Sweden              | SWE             |
| A                 | Gabon             | GAB             | A                 | Swaziland           | SWZ             |
| A                 | United Kingdom    | GBR             | A                 | Chad                | TCD             |
| A                 | Georgia           | GEO             | A                 | Togo                | TGO             |
| A                 | Ghana             | GHA             | A                 | Thailand            | THA             |
| A                 | Guinea            | GIN             | A                 | Tajikistan          | TJK             |
| A                 | Gambia            | GMB             | A                 | Trinidad and Tobago | TTO             |
| A                 | Guinea-Bissau     | GNB             | A                 | Tanzania            | TZA             |
| A                 | Equatorial Guinea | GNQ             | A                 | Uganda              | UGA             |
| A                 | Greece            | GRC             | A                 | Ukraine             | UKR             |
| A                 | Guatemala         | GTM             | A                 | Uruguay             | URY             |
| A                 | Guyana            | GUY             | A                 | United States       | USA             |
| A                 | Honduras          | HND             | A                 | Uzbekistan          | UZB             |
| A                 | Haiti             | HTI             | A                 | Vietnam             | VNM             |
| A                 | Hungary           | HUN             | A                 | South Africa        | ZAF             |
| A                 | Indonesia         | IDN             | A                 | Zambia              | ZMB             |
| A                 | India             | IND             | A                 | Zimbabwe            | ZWE             |
| A                 | Ireland           | IRL             | B                 | Bangladesh          | BGD             |
| A                 | Iran              | IRN             | B                 | Czech Rep.          | CZE             |
| A                 | Iceland           | ISL             | B                 | Germany             | DEU             |
| A                 | Israel            | ISR             | B                 | Egypt               | EGY             |
| A                 | Italy             | ITA             | B                 | Croatia             | HRV             |
| A                 | Jamaica           | JAM             | B                 | Japan               | JPN             |
| A                 | Kazakhstan        | KAZ             | B                 | Korea, Rep.         | KOR             |
| A                 | Kenya             | KEN             | B                 | Sri Lanka           | LKA             |
| A                 | Kyrgyzstan        | KGZ             | B                 | Maldives            | MDV             |
| A                 | Cambodia          | KHM             | B                 | Mongolia            | MNG             |
| A                 | Laos              | LAO             | B                 | Philippines         | PHL             |
| A                 | Lebanon           | LBN             | B                 | Qatar               | QAT             |
| A                 | Liberia           | LBR             | B                 | Slovak Republic     | SVK             |
| A                 | Lesotho           | LSO             | B                 | Slovenia            | SVN             |
| A                 | Lithuania         | LTU             | B                 | Tunisia             | TUN             |
| A                 | Luxembourg        | LUX             | B                 | Turkey              | TUR             |

## References

1. Johansson K, Lindgren M. Documentation for Life Expectancy at birth (years) for countries and territories. 2014.
2. IHME. Life Expectancy at birth (years). Institute for Health Metrics and Evaluation. 2014. Available from: <https://cloud.ihme.washington.edu/index.php/s/b89390325f728bbd99de0356d3be6900>. [Accessed 04 January 2016].
3. WPP. World Population Prospects: The 2012 Revision - Life expectancy at birth, both sexes. United Nations Population Division. 2012.
4. HMD. Human Mortality Database. University of California, Berkeley and Max Planck Institute for Demographic Research. 2009. Available from: <http://www.mortality.org> or [www.humanmortality.de](http://www.humanmortality.de). [Accessed 04 January 2016].
5. WPP. World Population Prospects: The 2006 Revision - Life expectancy at birth, both sexes. United Nations Population Division. 2008.
6. HMD. Human Mortality Database. University of California, Berkeley and Max Planck Institute for Demographic Research. 2013. Available from: <http://www.mortality.org> or [www.humanmortality.de](http://www.humanmortality.de). [Accessed 04 January 2016].
7. HMD. Human Mortality Database. University of California, Berkeley and Max Planck Institute for Demographic Research. 2011. Available from: <http://www.mortality.org> or [www.humanmortality.de](http://www.humanmortality.de). [Accessed 04 January 2016].
8. Heston, A., Summers, R., & Aten, B. Penn World Table Version 7.1, Center for International Comparisons of Production, Income and Prices at the University of Pennsylvania. 2012.
9. Ajus F, Lindgren M. Documentation for Children per Woman (Total Fertility Rate) for countries and territories. 2009.
10. WPP. World Population Prospects: The 2012 Revision - Children per women (total fertility) with projections. United Nations Population Division. 2013.
11. UN Population Division. World Population Prospects: The 2010 Revision - Population density (per square km). United Nations Population Division. 2013. Available from: <http://esa.un.org/unpd/wpp/Excel-Data/population.htm>. [Accessed 04 January 2016].
12. CDIAC. Per capita CO2 emissions (metric tons of CO2). Carbon Dioxide Information Analysis Center. 2015. Available from: <http://cdiac.ornl.gov/>. [Accessed 12 November 2015]. Carbon Dioxide Information Analysis Center;
13. UNAIDS. Estimated HIV Prevalence % - (Ages 15-49). United Nations Programme on HIV and AIDS. 2013. Available from: <http://www.gapminder.org/gapminder-world/documentation/gd006>. [Accessed 04 January 2016].
14. Jamison DT, Summers LH, Alleyne G, Arrow KJ, Berkley S, Binagwaho A, et al. Global health 2035: A world converging within a generation. *Lancet*. 2013;382:1898–955.
15. Hymes K, Greene J, Marcus A, William D, Cheung T, Prose N, et al. Kaposi'S Sarcoma in Homosexual Men—a Report of Eight Cases. *Lancet*. 1981;318:598–600.
